# Supplementary material
Source: publisher figshare collection journal article supplement (https://sage.figshare.com/ndownloader/files/13382156)
Supplement: Supplementary file 2 [file 13382156]

## Post-traumatic Stress Symptom Scale - Self-Report (PSS-SR)/PTSS Klachtenschaal

Foa, B. E., Riggs, S. D., Dancu, C. V., *et al* (1993) **Reliability and validity of a brief instrument for assessing post-traumatic stress disorder. *Journal of Traumatic Stress*, 6, 459 -473**

Patientnummer .....

Meting .....

Datum invulling .....

**Omcirkel het antwoord dat weergeeft in hoeverre u de afgelopen week last heeft gehad van de genoemde klacht.**

- |                                                                                                                                                                    |                                                                                           |
|--------------------------------------------------------------------------------------------------------------------------------------------------------------------|-------------------------------------------------------------------------------------------|
| 1. Hoe vaak heeft u de afgelopen week last gehad van pijnlijke gedachten of beelden over het trauma, terwijl u er niet aan wilde denken?                           | 0 = nooit<br>1 = 1x per week of minder<br>2 = 2 – 4x per week<br>3 = 5x of vaker per week |
| 2. Hoe vaak heeft u de afgelopen week onprettige dromen of nachtmerries over de traumatische gebeurtenis gehad?                                                    | 0 = nooit<br>1 = 1x per week of minder<br>2 = 2 – 4x per week<br>3 = 5x of vaker per week |
| 3. Hoe vaak heeft u de afgelopen week de ervaring gehad dat de traumatische gebeurtenis er weer was, of dat u handelde of zich net zo voelde als toen?             | 0 = nooit<br>1 = 1x per week of minder<br>2 = 2 – 4x per week<br>3 = 5x of vaker per week |
| 4. Hoe vaak heeft u de afgelopen week meegemaakt dat u emotioneel overstuurd raakte wanneer u aan de traumatische gebeurtenis herinnerd werd?                      | 0 = nooit<br>1 = 1x per week of minder<br>2 = 2 – 4x per week<br>3 = 5x of vaker per week |
| 5. Hoe vaak heeft u de afgelopen week lichamelijke reacties gehad (bv. in zweet uitbreken of hartkloppingen) als u aan de traumatische gebeurtenis werd herinnerd? | 0 = nooit<br>1 = 1x per week of minder<br>2 = 2 – 4x per week<br>3 = 5x of vaker per week |
| 6. Hoe vaak heeft u de afgelopen week geprobeerd niet aan de traumatische gebeurtenis te denken of geprobeerd niet de gevoelens te voelen die erbij horen?         | 0 = nooit<br>1 = 1x per week of minder<br>2 = 2 – 4x per week<br>3 = 5x of vaker per week |
| 7. Hoe vaak heeft u de afgelopen week geprobeerd om activiteiten, plaatsen of dingen te vermijden die u aan de traumatische gebeurtenis herinneren?                | 0 = nooit<br>1 = af en toe<br>2 = vrij vaak<br>3 = bijna altijd                           |
| 8. In hoeverre heeft u de afgelopen week moeite gehad om belangrijke delen van wat er gebeurd is (tijdens de traumatische gebeurtenis) te herinneren?              | 0 = helemaal geen moeite<br>1 = beetje<br>2 = nogal<br>3 = erg veel moeite                |
| 9. Was u de afgelopen week minder geïnteresseerd in dingen die u gewoonlijk belangrijk of leuk vindt (bv. hobby's, sociale activiteiten)?                          | 0 = nee, helemaal niet<br>1 = beetje<br>2 = nogal<br>3 = ja, heel sterk                   |

10. Voelde u zich de afgelopen week op een afstand of afgesneden van andere mensen? 0 = nee, helemaal niet  
1 = beetje  
2 = nogal  
3 = ja, heel sterk
11. Voelde u zich de afgelopen week gevoelloos (bv. niet kunnen huilen, niet reageren, onmogelijk om gevoelens van liefde te voelen)? 0 = nee, helemaal niet  
1 = beetje  
2 = nogal  
3 = ja, heel sterk
12. In hoeverre voelde u de afgelopen week dat uw toekomstplannen of verlangens de grond in geboord zijn t.g.v. de traumatische gebeurtenis (bv. nooit kunnen werken of carrière maken, geen gelukkige relatie kunnen hebben, geen gelukkige kinderen kunnen hebben, niet lang zullen leven)? 0 = nee, helemaal niet  
1 = beetje  
2 = nogal  
3 = ja, heel sterk
13. Hoe vaak heeft u de afgelopen week problemen gehad met inslapen of doorslapen? 0 = nooit  
1 = 1x per week of minder  
2 = 2 – 4x per week  
3 = 5x of vaker per week
14. In hoeverre heeft u de afgelopen week last gehad van snel geïrriteerd zijn of van woedeuitbarstingen? 0 = nooit  
1 = soms  
2 = vaak  
3 = erg vaak / altijd
15. In hoeverre heeft u de afgelopen week moeilijkheden gehad met concentreren (bv. de draad kwijtraken tijdens een gesprek, de tv niet meer kunnen volgen, niet meer weten wat u zojuist gelezen heeft)? 0 = nooit  
1 = soms  
2 = vaak  
3 = erg vaak / altijd
16. Was u de afgelopen week erg waakzaam, of op uw hoede (bv. controleren of er niemand in de buurt is, u ongemakkelijk voelen wanneer u geen overzicht heeft)? 0 = nooit  
1 = soms  
2 = vaak  
3 = erg vaak / altijd
17. Was u de afgelopen week erg schrikachtig / snel geschrokken? 0 = nooit  
1 = soms  
2 = vaak  
3 = erg vaak / altijd
18. Voelde u zich de afgelopen week erg schuldig over de traumatische gebeurtenis? 0 = nooit  
1 = soms  
2 = vaak  
3 = erg vaak / altijd
19. Heeft u zich de afgelopen week erg geschaamd over wat er gebeurd is? 0 = nooit  
1 = soms  
2 = vaak  
3 = erg vaak / altijd
20. Had u de afgelopen week veel gevoelens van kwaadheid over wat er gebeurd is? 0 = nooit  
1 = soms  
2 = vaak  
3 = erg vaak / altijd

21. Was u m.n. kwaad op uzelf of op anderen? (één antwoord)
1. alleen op anderen
  2. vooral op anderen, maar ook op mezelf
  3. vooral op mezelf, maar ook op anderen
  4. alleen op mezelf
  5. niet van toepassing

22. In hoeverre was u er de afgelopen week van overtuigd dat u heel erg gewond zou hebben kunnen raken tijdens de traumatische gebeurtenis?
- 0 = helemaal niet  
1 = beetje  
2 = nogal sterk  
3 = helemaal

23. In hoeverre was u er de afgelopen week van overtuigd dat uw leven op het spel stond tijdens de traumatische gebeurtenis?
- 0 = helemaal niet  
1 = beetje  
2 = nogal sterk  
3 = helemaal
