# Supplementary material
Source: publisher figshare collection journal article supplement (https://sage.figshare.com/ndownloader/files/13382156)
Supplement: Supplementary file 4 [file 13382156]

Dato: \_\_\_\_\_ Ratingnr.: \_\_\_\_\_ Label:

**Part IV Trauma Symptoms****الجزء الرابع : أعراض الإصابات**

The following are symptoms that people sometimes have after experiencing hurtful or terrifying events in their lives. Please read each one carefully and decide how much the symptoms bothered you **in the past week**.

كثير من الناس الذين تعرضوا في حياتهم لأحداث مفرعة أو مؤلمة ، يشعرون أحيانا بأعراض /  
أمراض كالمذكورة لاحقا . نرجوا منك أن تقرا كل واحد منها بتمعن ودقة ثم - ما هو مقدار  
الأعراض التي شعرت بها في الأسبوع الماضي .

| ٤<br>بشدة<br>Extremely | ٣<br>بكثرة<br>Quite a bit | ٢<br>قليلا<br>A little | ١<br>كلا على<br>الاطلاق<br>Not at all |                                                                                                                                   |   |
|------------------------|---------------------------|------------------------|---------------------------------------|-----------------------------------------------------------------------------------------------------------------------------------|---|
|                        |                           |                        |                                       | Recurrent thoughts or memories of the most hurtful or terrifying events.<br>عودة الذكريات والأفكار عن أكثر الحوادث المأ و فزعاً . | 1 |
|                        |                           |                        |                                       | Feeling as though the event is happening again.<br>الشعور وكأن المأثة تتكرر مرة أخرى .                                            | 2 |
|                        |                           |                        |                                       | Recurrent nightmares.<br>تكرار الأحلام المزعجة / الكوابيس .                                                                       | 3 |
|                        |                           |                        |                                       | Feeling detached or withdrawn from people.<br>الشعور بالانفصال عن حولك من الناس .                                                 | 4 |
|                        |                           |                        |                                       | Unable to feel emotions.<br>عدم المقدرة على الانفعال أو العاطفة .                                                                 | 5 |
|                        |                           |                        |                                       | Feeling jumpy, easily startled.<br>تقلب المزاج وسرعة الهيجان والبنفان .                                                           | 6 |
|                        |                           |                        |                                       | Difficulty concentrating.<br>صعوبة التركيز .                                                                                      | 7 |
|                        |                           |                        |                                       | Trouble sleeping.<br>صعوبة النوم .                                                                                                | 8 |

Date: \_\_\_\_\_ Ratingnr.: \_\_\_\_\_ Label: \_\_\_\_\_

| ٤<br>بشدة<br>Extremely | ٣<br>بكثرة<br>Quite a bit | ٢<br>قليل<br>A little | ١<br>كلا على<br>الاطلاق<br>Not at all |                                                                                                                                                                               |    |
|------------------------|---------------------------|-----------------------|---------------------------------------|-------------------------------------------------------------------------------------------------------------------------------------------------------------------------------|----|
|                        |                           |                       |                                       | Feeling on guard.<br>هل تشعر بالمطر والميطة .                                                                                                                                 | 9  |
|                        |                           |                       |                                       | Feeling irritable or having outbursts of anger.<br>هل تشعر بسرعة الغضب والانفعال .                                                                                            | 10 |
|                        |                           |                       |                                       | Avoiding activities that remind you of the<br>traumatic or hurtful event.<br>هل تتجنب النشاطات التي تذكرك بالصدمة والاحداث<br>المؤلمة .                                       | 11 |
|                        |                           |                       |                                       | Inability to remember parts of the most<br>traumatic or hurtful events.<br>عدم القدرة على تذكر اجزاء/فصول من المواقف المؤلمة<br>والاكثر فزعاً وأذى .                          | 12 |
|                        |                           |                       |                                       | Less interest in daily activities.<br>قلة الاهتمام بالنشاطات اليومية .                                                                                                        | 13 |
|                        |                           |                       |                                       | Feeling as if you don't have a future.<br>هل تشعر بأنه لا مستقبل لك .                                                                                                         | 14 |
|                        |                           |                       |                                       | Avoiding thoughts or feelings associated with<br>the traumatic or hurtful experience.<br>تجنب الأفكار والمشاعر المرتبطة بالاحداث المؤلمة<br>والمسببة للأذى .                  | 15 |
|                        |                           |                       |                                       | Sudden emotional or physical reaction when<br>reminded of the most hurtful or traumatic<br>events.<br>ردة فعل عاطفية او جسمية اذا تذكرت فجأة ، أكثر<br>المواقف ايلاماً وأذى . | 16 |
