# Supplementary material
Source: publisher figshare collection journal article supplement (https://sage.figshare.com/ndownloader/files/13382156)
Supplement: Supplementary file 5 [file 13382156]

Dato: \_\_\_\_\_ Ratingnr.: \_\_\_\_\_ Label: \_\_\_\_\_

## HARVARD TRAUMA QUESTIONNAIRE

De følgende spørgsmål drejer sig om symptomer, som folk kan have efter at have oplevet ubehagelige eller voldsomme begivenheder. Vi vil bede dig afgøre nøje, i hvilken grad du er plaget af symptomerne i dit nuværende liv. (Sæt ét x ved hvert spørgsmål).

|                                                                                                   | (1)       | (2)      | (3)            | (4)           |
|---------------------------------------------------------------------------------------------------|-----------|----------|----------------|---------------|
|                                                                                                   | Slet ikke | Sjældent | Noget af tiden | For det meste |
| 1. Tilbagevendende tanker eller erindringer om de ubehagelige og voldsomme begivenheder           |           |          |                |               |
| 2. Følt som om du oplever begivenhederne igen                                                     |           |          |                |               |
| 3. Tilbagevendende mareridt om begivenhederne                                                     |           |          |                |               |
| 4. Føler dig isoleret fra andre mennesker                                                         |           |          |                |               |
| 5. Ude af stand til at mærke følelser                                                             |           |          |                |               |
| 6. Bliver let forskrækket                                                                         |           |          |                |               |
| 7. Har svært ved at koncentrere dig                                                               |           |          |                |               |
| 8. Har søvnbesvær                                                                                 |           |          |                |               |
| 9. Føler at du er på vagt                                                                         |           |          |                |               |
| 10. Føler dig irriteret                                                                           |           |          |                |               |
| 11. Undgår aktiviteter, der minder dig om de ubehagelige og voldsomme begivenheder                |           |          |                |               |
| 12. Ude af stand til at huske dele af begivenhederne                                              |           |          |                |               |
| 13. Formindsket interesse i dagligdags aktiviteter                                                |           |          |                |               |
| 14. Føler som om du ikke har nogen fremtid                                                        |           |          |                |               |
| 15. Undgår tanker og følelser, der er forbundet med de ubehagelige og voldsomme begivenheder      |           |          |                |               |
| 16. Pludselige følelsesmæssige eller kropslige reaktioner, når du bliver mindet om begivenhederne |           |          |                |               |
