# Supplementary material
Source: publisher figshare collection journal article supplement (https://sage.figshare.com/ndownloader/files/13382156)
Supplement: Supplementary file 6 [file 13382156]

The graph consists of 16 nodes, numbered 1 to 16, arranged in a circular layout. The nodes are connected by a dense network of edges. The edges are color-coded: most are light blue, while a few are dark blue. A single edge between nodes 1 and 2 is highlighted in red. The nodes are arranged in a circular pattern, with node 1 at the top right and node 16 at the top left. The edges connect nodes in a complex, overlapping manner, creating a dense web of connections.
