# Supplementary material
Source: publisher figshare collection journal article supplement (https://sage.figshare.com/ndownloader/files/13382156)
Supplement: Supplementary file 7 [file 13382156]

## 7. Posttraumatiske stress-symptomer (PCL)

### Instruktion:

Nedenfor finder du en liste af problemer og gener, som folk somme tider har efter en belastende livsbegivenhed/oplevelse.

1. Læs hver beskrivelse grundigt, og markér i hvilken grad du har haft problemer inden for den **sidste måned**.

1. del

|                                                                                                                                      | Slet ikke             | En smule              | Noget                 | En del                | I høj grad            |
|--------------------------------------------------------------------------------------------------------------------------------------|-----------------------|-----------------------|-----------------------|-----------------------|-----------------------|
| 1. Gentagne, forstyrrende minder, tanker eller billeder vedrørende en belastende oplevelse fra fortiden?                             | <input type="radio"/> |
| 2. Gentagne, forstyrrende drømme om en belastende oplevelse fra fortiden?                                                            | <input type="radio"/> |
| 3. Pludselig handle eller føle som om en belastende oplevelse fra fortiden skete på ny (som om du genoplevede den)?                  | <input type="radio"/> |
| 4. Føle dig meget oprevet, når noget mindede dig om en belastende oplevelse fra fortiden?                                            | <input type="radio"/> |
| 5. Have fysiske reaktioner (fx. hjertebanken, åndedrætsbesvær, sved), når noget mindede dig om en belastende oplevelse fra fortiden? | <input type="radio"/> |
| 6. Undgå at tænke på eller tale om en belastende oplevelse fra fortiden eller undgå at føle noget i relation hertil?                 | <input type="radio"/> |
| 7. Undgå aktiviteter eller situationer, fordi de mindede dig om en belastende situation fra fortiden?                                | <input type="radio"/> |

|                                                                                      | Slet ikke             | En smule              | Noget                 | En del                | I høj grad            |
|--------------------------------------------------------------------------------------|-----------------------|-----------------------|-----------------------|-----------------------|-----------------------|
| 8. Have svært ved at huske væsentlige dele af en belastende begivenhed fra fortiden? | <input type="radio"/> |
| 9. Manglende interesse for aktiviteter, som du plejer at sætte pris på?              | <input type="radio"/> |
| 10. Føle dig fjern eller afskåret fra andre mennesker?                               | <input type="radio"/> |

2. Læs hver beskrivelse grundigt, og markér i hvilken grad du har haft problemer inden for den **sidste måned**.

2. del

|                                                                                                    | Slet ikke             | En smule              | Noget                 | En del                | I høj grad            |
|----------------------------------------------------------------------------------------------------|-----------------------|-----------------------|-----------------------|-----------------------|-----------------------|
| 11. Føle dig følelsesmæssig "tom" eller ude af stand til at nære varme følelser for dine nærmeste? | <input type="radio"/> |
| 12. Føle det som om din fremtid på en eller anden måde vil blive kort?                             | <input type="radio"/> |
| 13. Svært ved at falde i søvn og/eller sove igennem?                                               | <input type="radio"/> |
| 14. Være irriteret eller have vredesudbrud?                                                        | <input type="radio"/> |
| 15. Have koncentrationsvanskeligheder?                                                             | <input type="radio"/> |
| 16. Være ekstra årvågen, påpasselig eller på vagt?                                                 | <input type="radio"/> |
| 17. Være urolig eller let at forskrække?                                                           | <input type="radio"/> |

Instruktion:

Tænk på den begivenhed som du brugte til at besvare 1-8. De følgende spørgsmål besvares med Ja eller Nej

3. Var du selv i livsfare, og/eller var du direkte vidne til, at andre var i livsfare?

|      | Ja                    | Nej                   |
|------|-----------------------|-----------------------|
| Svar | <input type="radio"/> | <input type="radio"/> |

4. Kom du selv til skade, og/eller var du direkte vidne til, at andre kom til skade?

|      | Ja                    | Nej                   |
|------|-----------------------|-----------------------|
| Svar | <input type="radio"/> | <input type="radio"/> |

5. Oplevede du under begivenheden, at du reagerede med intens frygt, hjælpeløshed eller rædsel?

Ja

Nej

Svar

☐☐

6. Har du modtaget debriefing eller anden form for psykologhjælp i forbindelse med oplevelsen?

Ja

Nej

Svar

☐☐
