# Supplementary material
Source: publisher figshare collection journal article supplement (https://sage.figshare.com/ndownloader/files/13382156)
Supplement: Supplementary file 10 [file 13382156]

# HARVARD TRAUMA QUESTIONNAIRE

## Revised (HTQ-R)

### PART 4: TRAUMA SYMPTOMS

The following are symptoms that people sometimes have after experiencing hurtful or terrifying events in their lives. Please read each one carefully and decide how much the symptoms bothered you in the past week.

|     |                                                                                             | (1)<br>Not at all | (2)<br>A little | (3)<br>Quite a bit | (4)<br>Extremely |
|-----|---------------------------------------------------------------------------------------------|-------------------|-----------------|--------------------|------------------|
| 1.  | Recurrent thoughts or memories of the most hurtful or terrifying events                     |                   |                 |                    |                  |
| 2.  | Feeling as though the event is happening again                                              |                   |                 |                    |                  |
| 3.  | Recurrent nightmares                                                                        |                   |                 |                    |                  |
| 4.  | Feeling detached or withdrawn from people                                                   |                   |                 |                    |                  |
| 5.  | Unable to feel emotions                                                                     |                   |                 |                    |                  |
| 6.  | Feeling jumpy, easily startled                                                              |                   |                 |                    |                  |
| 7.  | Difficulty concentrating                                                                    |                   |                 |                    |                  |
| 8.  | Trouble sleeping                                                                            |                   |                 |                    |                  |
| 9.  | Feeling on guard                                                                            |                   |                 |                    |                  |
| 10. | Feeling irritable or having outbursts of anger                                              |                   |                 |                    |                  |
| 11. | Avoiding activities that remind you of the traumatic or hurtful event                       |                   |                 |                    |                  |
| 12. | Inability to remember parts of the most hurtful or traumatic events                         |                   |                 |                    |                  |
| 13. | Less interest in daily activities                                                           |                   |                 |                    |                  |
| 14. | Feeling as if you don't have a future                                                       |                   |                 |                    |                  |
| 15. | Avoiding thoughts or feelings associated with the traumatic or hurtful events               |                   |                 |                    |                  |
| 16. | Sudden emotional or physical reaction when reminded of the most hurtful or traumatic events |                   |                 |                    |                  |
