# Supplementary material
Source: publisher figshare collection journal article supplement (https://sage.figshare.com/ndownloader/files/13382156)
Supplement: Supplementary file 13 [file 13382156]

## DIO IV: TRAUMATSKI SIMPTOMI

### PART IV: TRAUMA SYMPTOMS

Navesti ćemo tegobe koje ljudi ponekad imaju nakon doživljavanja bolnih i zastrašujućih događaja u životu. Molimo da nam kažete koje od navedenih tegoba i u kojoj mjeri ste osjećali tokom prošle sedmice.

*The following are symptoms that people sometimes have after experiencing hurtful or terrifying events in their lives. Please read each one carefully and decide how much the symptoms bothered you in the past week.*

|    |                                                                                                                                                             | (1)<br>Nimalo<br><i>Not at all</i> | (2)<br>Vrlo<br>Malo<br><i>A little</i> | (3)<br>Prilično<br><i>Quite a bit</i> | (4)<br>Vrlo Jako<br><i>Extremely</i> |
|----|-------------------------------------------------------------------------------------------------------------------------------------------------------------|------------------------------------|----------------------------------------|---------------------------------------|--------------------------------------|
| 1. | Ponavljaju Vam se misli ili sjećanja na najteže ili zastrašujuće događaje<br><i>Recurrent thoughts or memories of the most hurtful or terrifying events</i> |                                    |                                        |                                       |                                      |
| 2. | Osjećate da Vam se to ponovo dešava<br><i>Feeling as though the event is happening again</i>                                                                |                                    |                                        |                                       |                                      |
| 3. | Noćne more koje se ponavljaju<br><i>Recurrent nightmares</i>                                                                                                |                                    |                                        |                                       |                                      |
| 4. | Osjećate se odvojeni od ljudi ili se povlačite u sebe<br><i>Feeling detached or withdrawn from people</i>                                                   |                                    |                                        |                                       |                                      |
| 5. | Nesposobni ste da volite, mrzite, itd.<br><i>Unable to feel emotions</i>                                                                                    |                                    |                                        |                                       |                                      |
| 6. | Napeti ste i trgnete se na bilo koji jači podražaj<br><i>Feeling jumpy, easily startled</i>                                                                 |                                    |                                        |                                       |                                      |
| 7. | Teško se usredsredite na nešto<br><i>Difficulty concentrating</i>                                                                                           |                                    |                                        |                                       |                                      |

# Harvard Trauma Questionnaire (HTQ)

Dato: \_\_\_\_\_ Ratingnr.: \_\_\_\_\_ Label: \_\_\_\_\_

|     |                                                                                                                                                                                        | (1)<br>Nimalo<br><i>Not at all</i> | (2)<br>Vrlo<br>Malo<br><i>A little</i> | (3)<br>Prilično<br><i>Quite a bit</i> | (4)<br>Vrlo Jako<br><i>Extremely</i> |
|-----|----------------------------------------------------------------------------------------------------------------------------------------------------------------------------------------|------------------------------------|----------------------------------------|---------------------------------------|--------------------------------------|
| 8.  | Imate problema sa spavanjem<br><i>Trouble sleeping</i>                                                                                                                                 |                                    |                                        |                                       |                                      |
| 9.  | Stalno ste na oprezu<br><i>Feeling on guard</i>                                                                                                                                        |                                    |                                        |                                       |                                      |
| 10. | Lako "planete" ili ste razdražljivi<br><i>Feeling irritable or having outbursts of anger</i>                                                                                           |                                    |                                        |                                       |                                      |
| 11. | Pokušavate da ne obavljate ono što Vas podsjeća na bolne događaje<br><i>Avoiding activities that remind you of the traumatic or hurtful event</i>                                      |                                    |                                        |                                       |                                      |
| 12. | Osjećate praznine kad mislite na bolne događaje<br><i>Inability to remember parts of the most hurtful or traumatic events</i>                                                          |                                    |                                        |                                       |                                      |
| 13. | Slabije ste zainteresirani za svakodnevni posao<br><i>Less interest in daily activities</i>                                                                                            |                                    |                                        |                                       |                                      |
| 14. | Osjećate da nemate budućnosti<br><i>Feeling as if you don't have a future</i>                                                                                                          |                                    |                                        |                                       |                                      |
| 15. | Izbjegavate misliti na ono što Vam se dogodalo<br><i>Avoiding thoughts or feelings associated with the traumatic or hurtful events</i>                                                 |                                    |                                        |                                       |                                      |
| 16. | Uznemirite se kad pomislite ili kad Vas nešto podsjeti na ono što ste preživjeli<br><i>Sudden emotional or physical reaction when reminded of the most hurtful or traumatic events</i> |                                    |                                        |                                       |                                      |
