# Supplementary material
Source: publisher figshare collection journal article supplement (https://sage.figshare.com/ndownloader/files/13382156)
Supplement: Supplementary file 15 [file 13382156]

Date: \_\_\_\_\_ Ratingnr.: \_\_\_\_\_ Label: \_\_\_\_\_

The following are symptoms that people sometimes have after experiencing hurtful or terrifying events in their life. Please read each one carefully and decide how much the symptoms bothered you in the last week.

علایم عنوان شده در زیر برخی اوقات از طرف افرادی  
که تحت شرایط سخت و دردناکی بسر برده اند نشان داده  
میشود. خواهشمندیم که هر کدام از علایم زیر را با دقت  
خوانده و سپس تعیین کنید که طی هفته گذشته شما تا  
چه حد از این علایم رنج میبردید.

بسیار زیاد      زیاد      کم      اصلا  
Extremely      Quite a bit      A little      Not at all

|  |  |  |  |                                                                                                                                         |
|--|--|--|--|-----------------------------------------------------------------------------------------------------------------------------------------|
|  |  |  |  | افکار یا خاطرات تکراری از دردآورترین یا وحشتناکترین اتفاقات<br>Recurrent thoughts or memories of the most hurtful or terrifying events. |
|  |  |  |  | 2 احساس اینکه این اتفاق دوباره دلود تکرار می شود.<br>Feeling as though the event is happening again.                                    |
|  |  |  |  | 3 کابوسهای تکراری<br>Recurrent nightmares.                                                                                              |
|  |  |  |  | 4 انزوا طلبی و احساس جدایی و کناره گیری از مردم.<br>Feeling detached or withdrawn from people.                                          |

# Harvard Trauma Questionnaire (HTQ)

Date: \_\_\_\_\_ Ratingnr.: \_\_\_\_\_ Label: \_\_\_\_\_

بسیار زیاد      زیاد      کم      اصلا  
Extremely      Quite a bit      A little      Not at all

|  |  |  |  |                                                                                                                                                                                                     |
|--|--|--|--|-----------------------------------------------------------------------------------------------------------------------------------------------------------------------------------------------------|
|  |  |  |  | <p>5 ناتوانی از حس کردن احساسات.</p> <p>Unable to feel emotions.</p>                                                                                                                                |
|  |  |  |  | <p>6 هیجان زیاد داشتن و از هر چیز کوچکی ترسیدن.</p> <p>Feeling jumpy, easily startled</p>                                                                                                           |
|  |  |  |  | <p>7 مشکل عدم تمرکز.</p> <p>Difficulty concentrating</p>                                                                                                                                            |
|  |  |  |  | <p>8 مشکل بی خوابی.</p> <p>Trouble sleeping</p>                                                                                                                                                     |
|  |  |  |  | <p>9 حالت دفاعی داشتن.</p> <p>Feeling on guard</p>                                                                                                                                                  |
|  |  |  |  | <p>10 به سادگی تحریک شدن یا به سادگی عصبانی شدن.</p> <p>Feeling irritable or having outbursts of anger</p>                                                                                          |
|  |  |  |  | <p>11 پرهیز از کارهایی که شما را به یاد اتفاقات ناراحت کننده یا تراماتیک (traumatic) می اندازد.</p> <p>Avoiding activities that remind you of the traumatic or hurtful event</p>                    |
|  |  |  |  | <p>12 عدم توانایی از به یاد آوردن قسمتهائی از ناراحت کننده ترین یا تراماتیکترین (traumatic) اتفاقاتی که افتاده است.</p> <p>Inability to remember parts of the most traumatic or hurtful events.</p> |

# Harvard Trauma Questionnaire (HTQ)

Dato: \_\_\_\_\_ Ratingnr.: \_\_\_\_\_ Label:

بسیار زیاد      زیاد      کم      اصلا  
Extremely      Quite a bit      A little      Not at all

|  |  |  |  |                                                                                                                                                                                                                                  |
|--|--|--|--|----------------------------------------------------------------------------------------------------------------------------------------------------------------------------------------------------------------------------------|
|  |  |  |  | <p>13 احساس بی علائقی به کارهای روزمره.</p> <p>Less interest in daily activities.</p>                                                                                                                                            |
|  |  |  |  | <p>14 احساس اینکه آینده ای در پیش رو ندارید.</p> <p>Feeling as if you don't have a future.</p>                                                                                                                                   |
|  |  |  |  | <p>15. پرهیز از افکار یا احساساتی که شما را به یاد تجربیات ناراحت کننده یا تراماتیک (traumatic) می اندازد.</p> <p>Avoiding thoughts or feelings associated with the traumatic or hurtful experience.</p>                         |
|  |  |  |  | <p>16. عکس عملهای ناگهانی روحی یا جسمی وقتی به یاد ناراحت کننده ترین یا تراماتیکترین (traumatic) اتفاقات گذشته می افتید.</p> <p>Sudden emotional or physical reaction when reminded of the most hurtful or traumatic events.</p> |
