# Supplementary material
Source: publisher figshare collection journal article supplement (https://sage.figshare.com/ndownloader/files/13382156)

edge

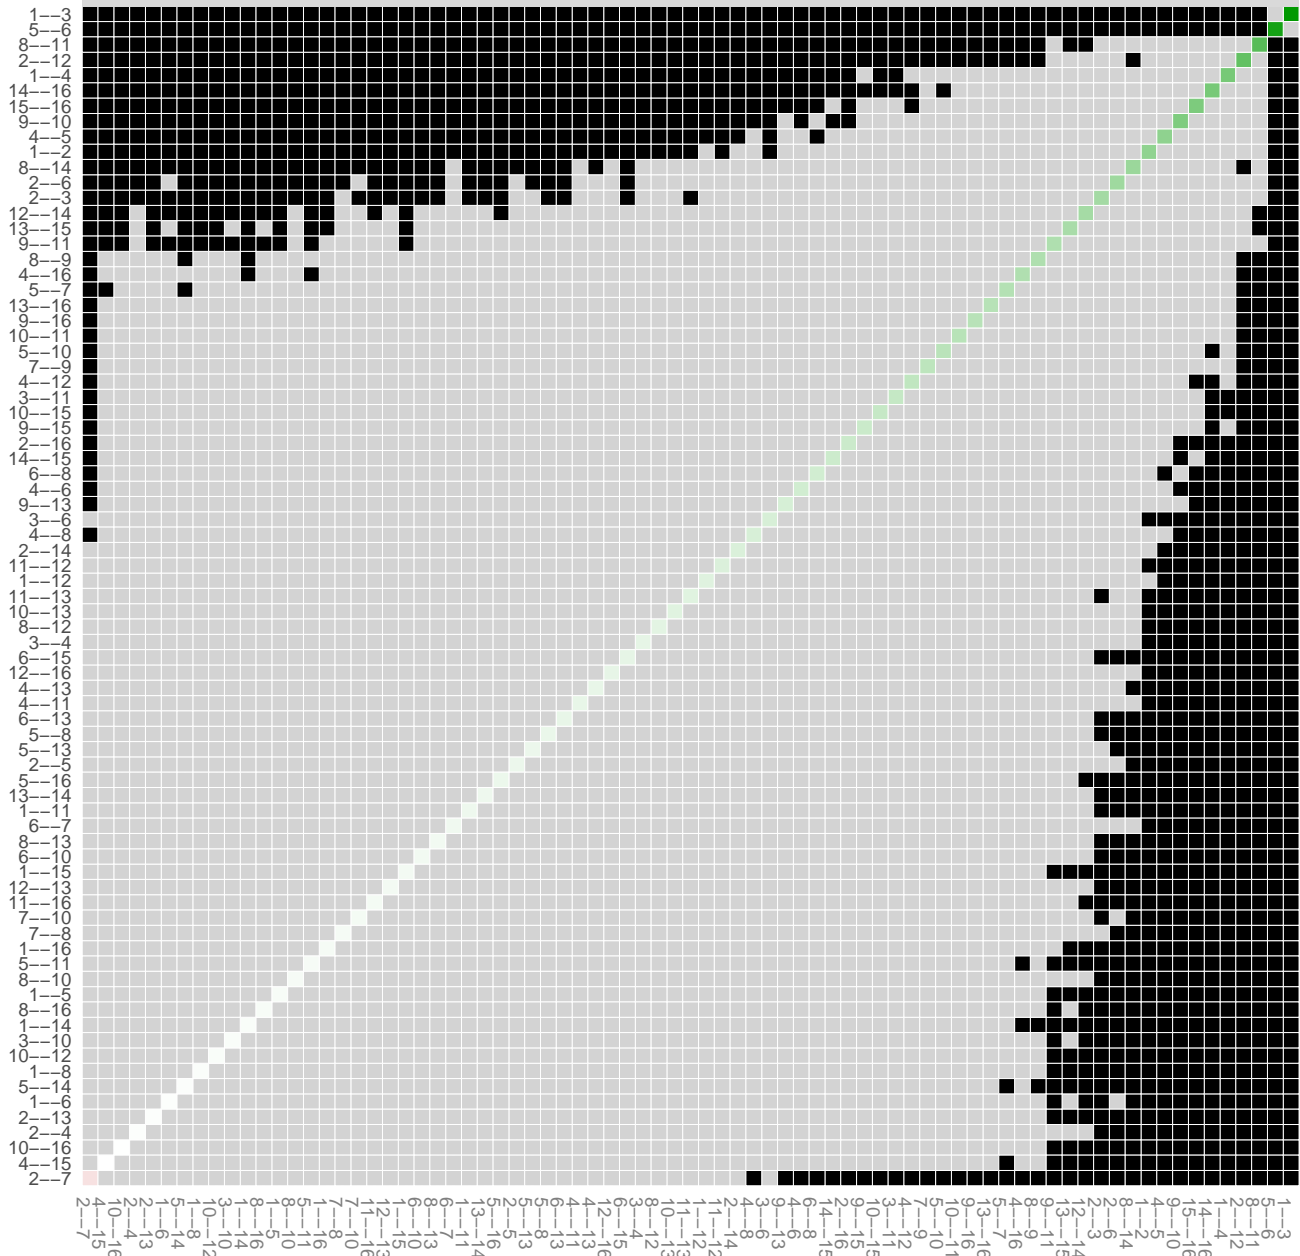

edge

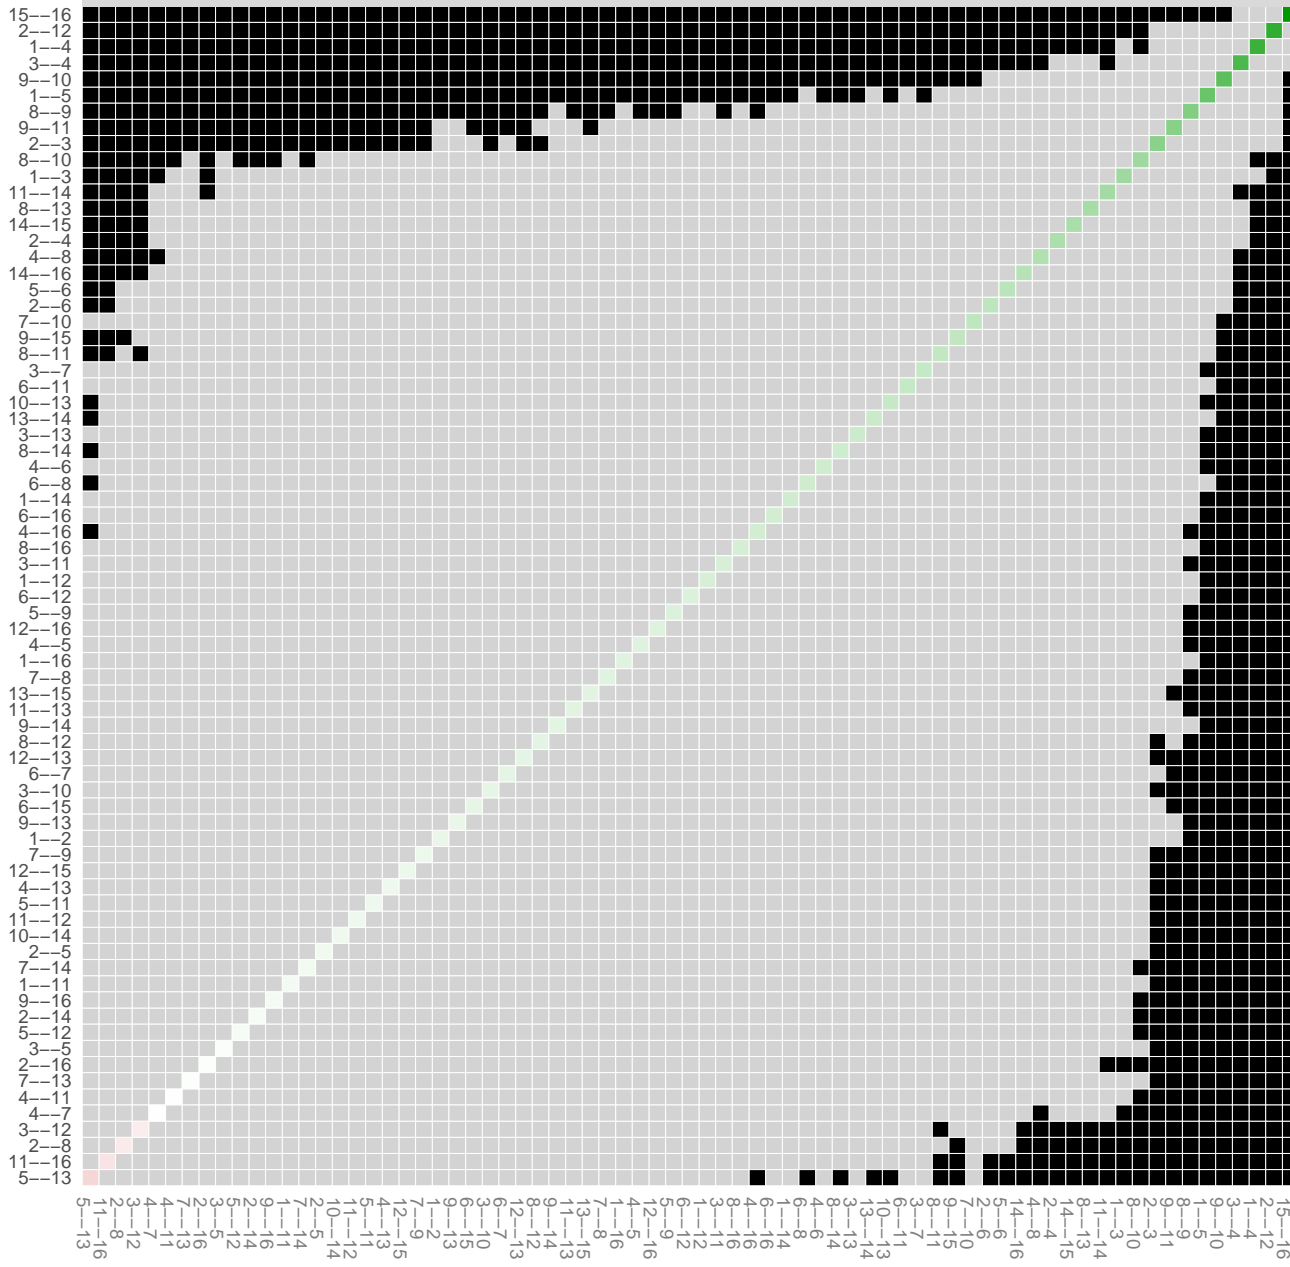

edge

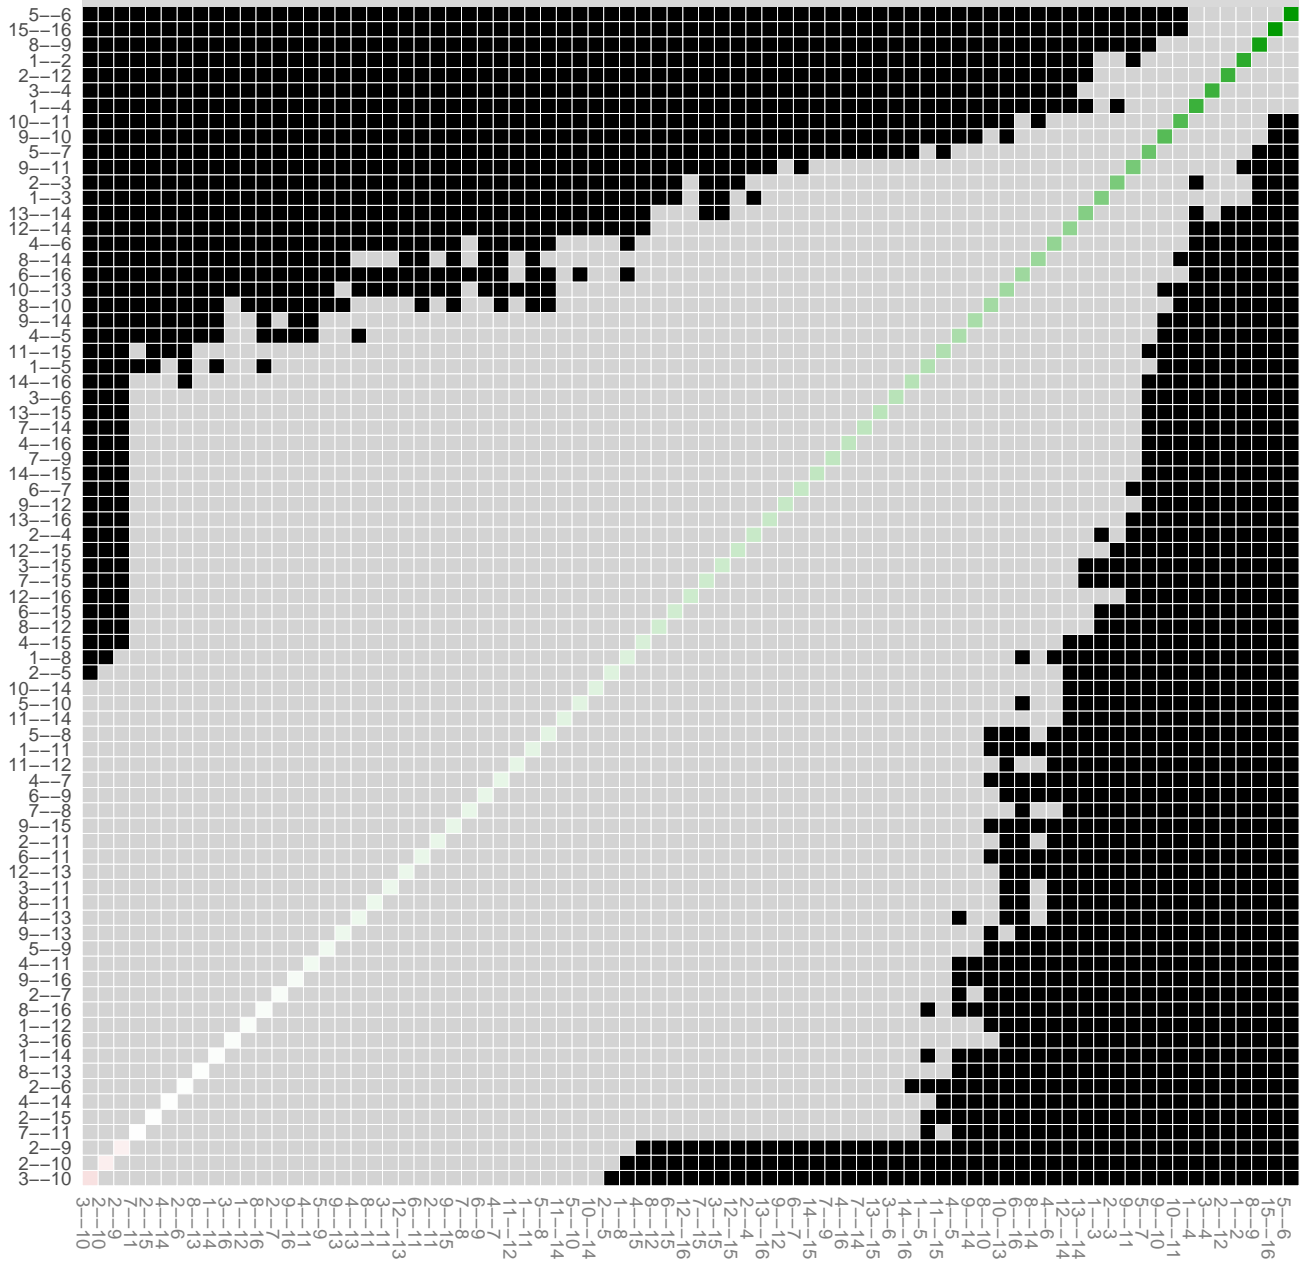

edge

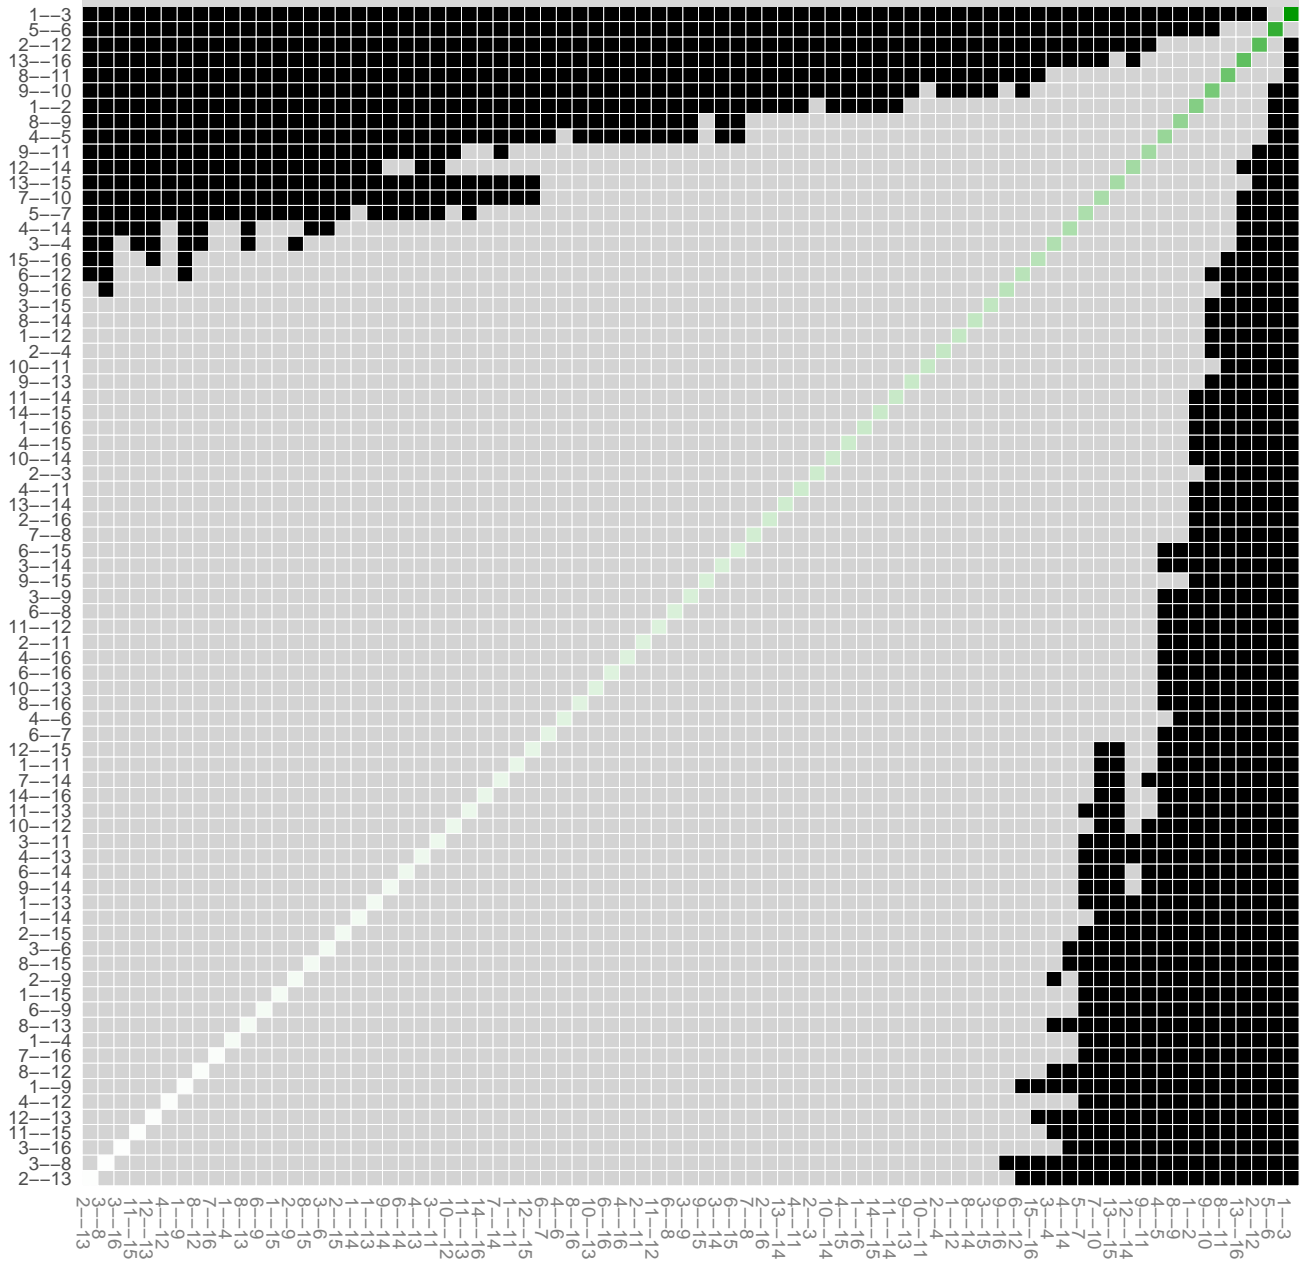

Supplement: Supplementary file 1 [file 13382156]

McNally et al. 2015

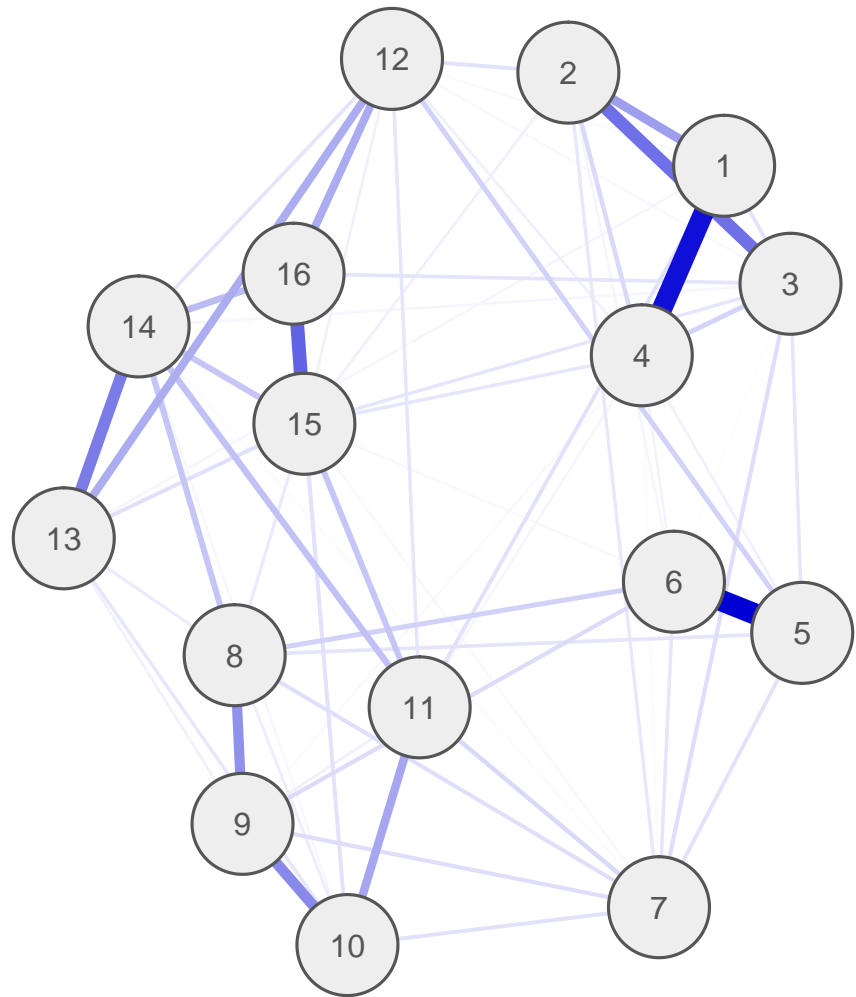

Present paper, Fried et al. 2017

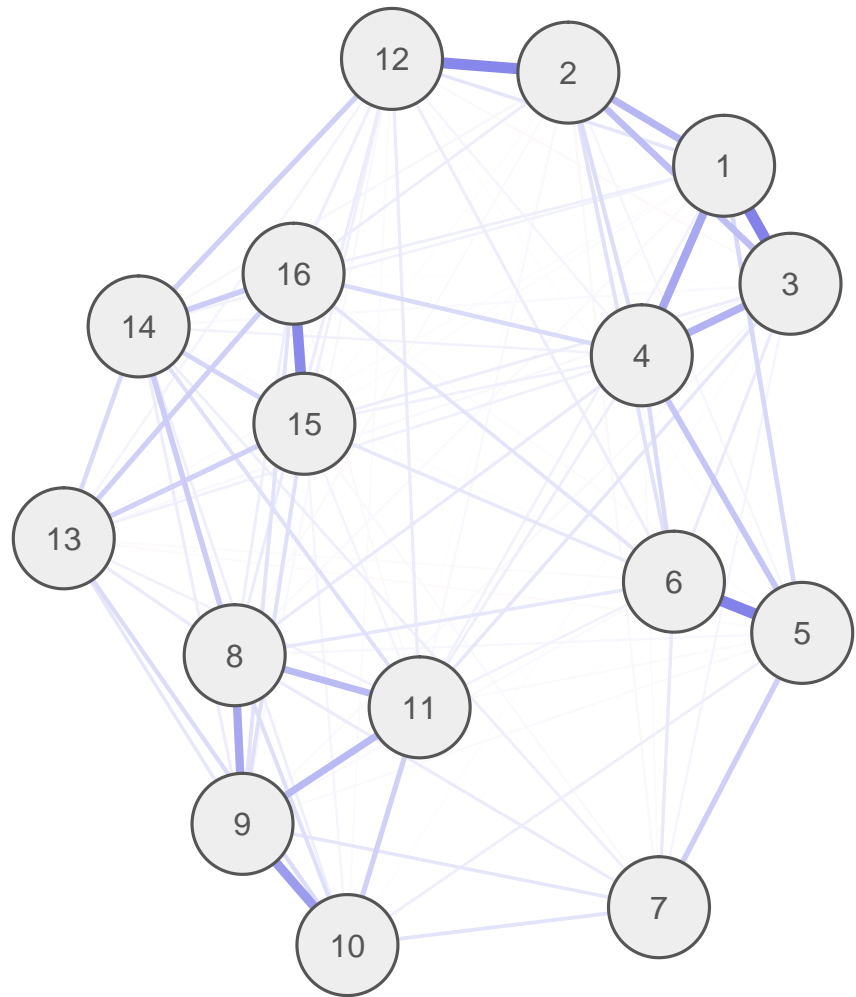

Supplement: Supplementary file 3 [file 13382156]

edge

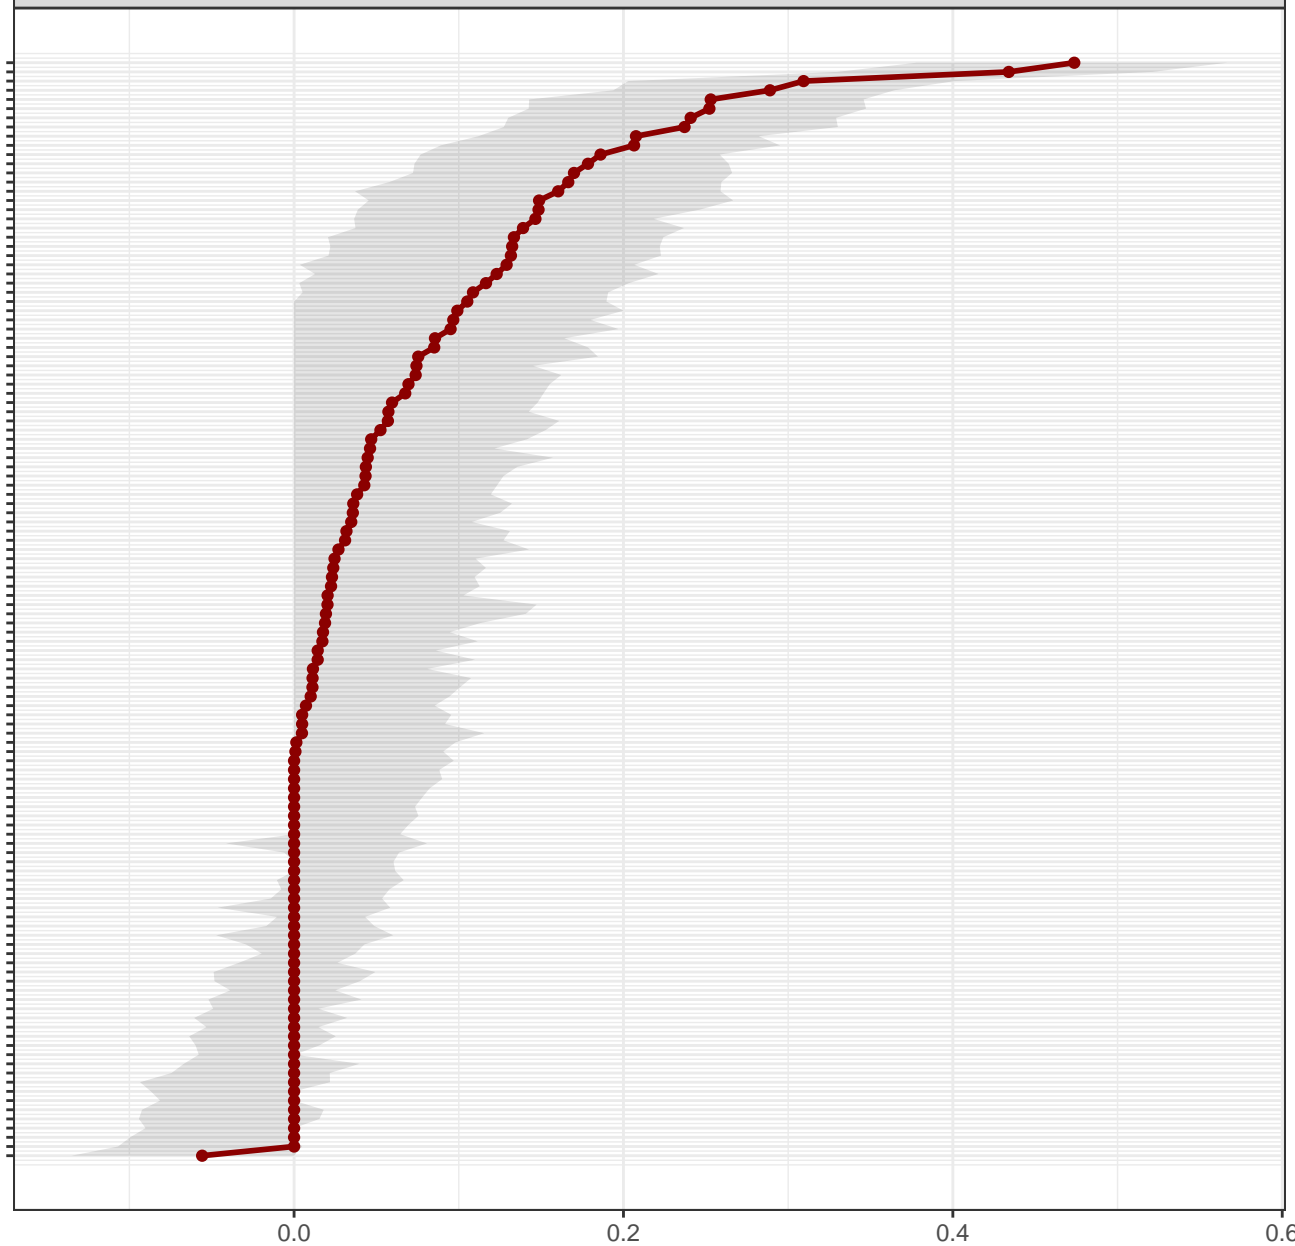

edge

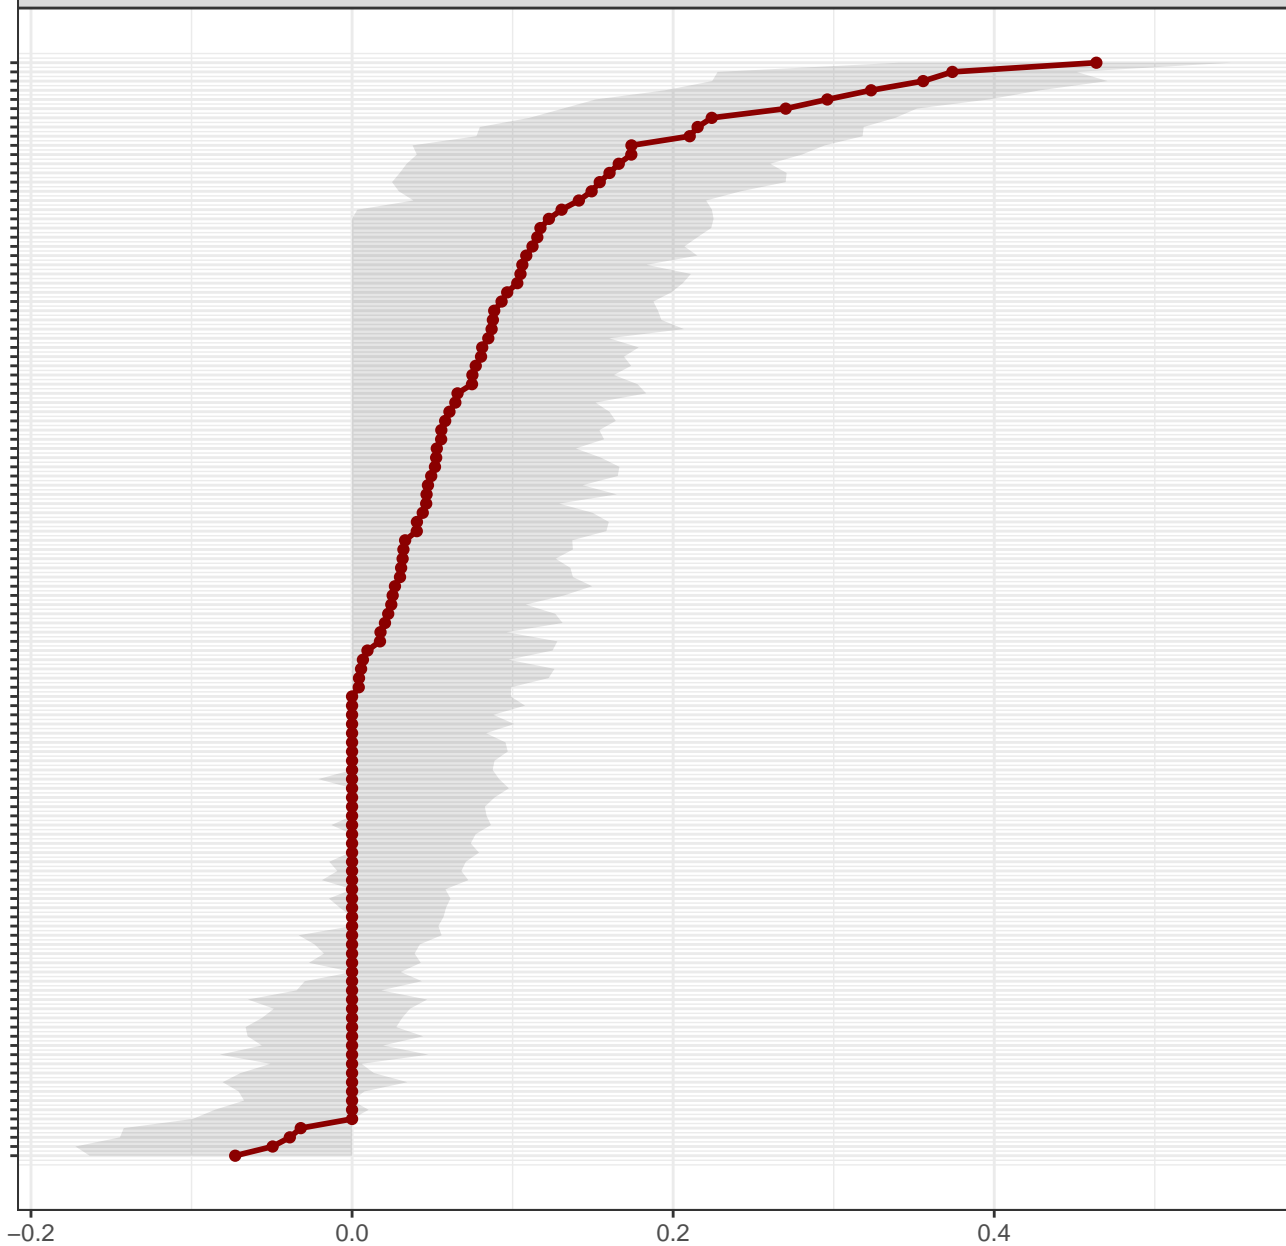

edge

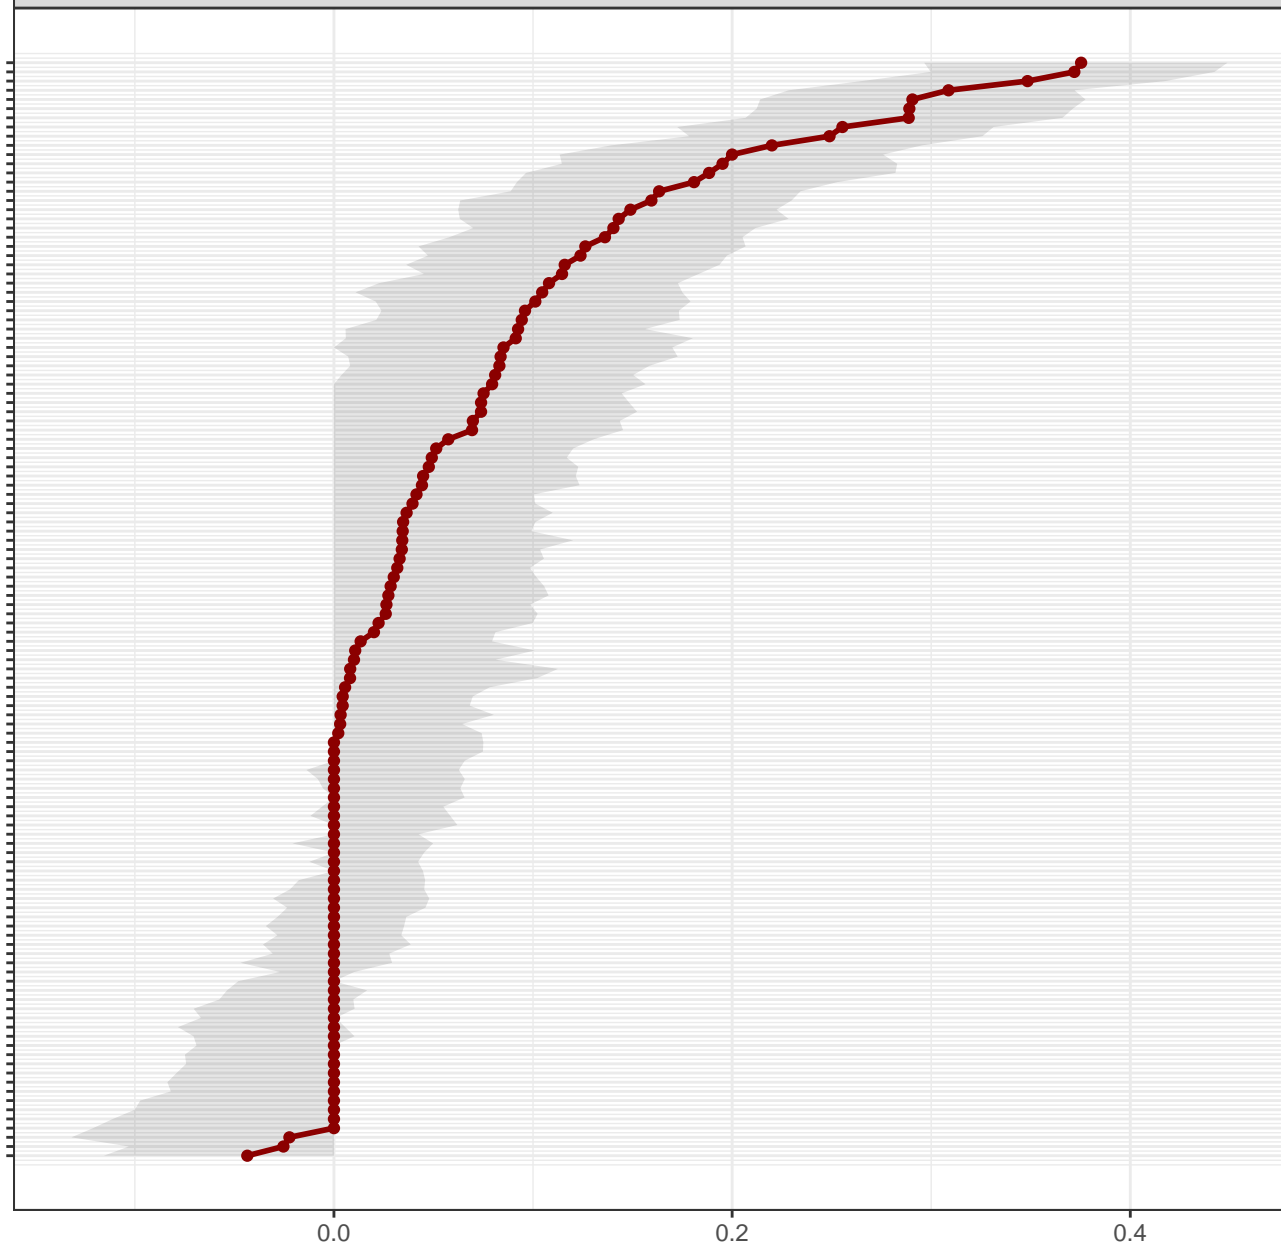

edge

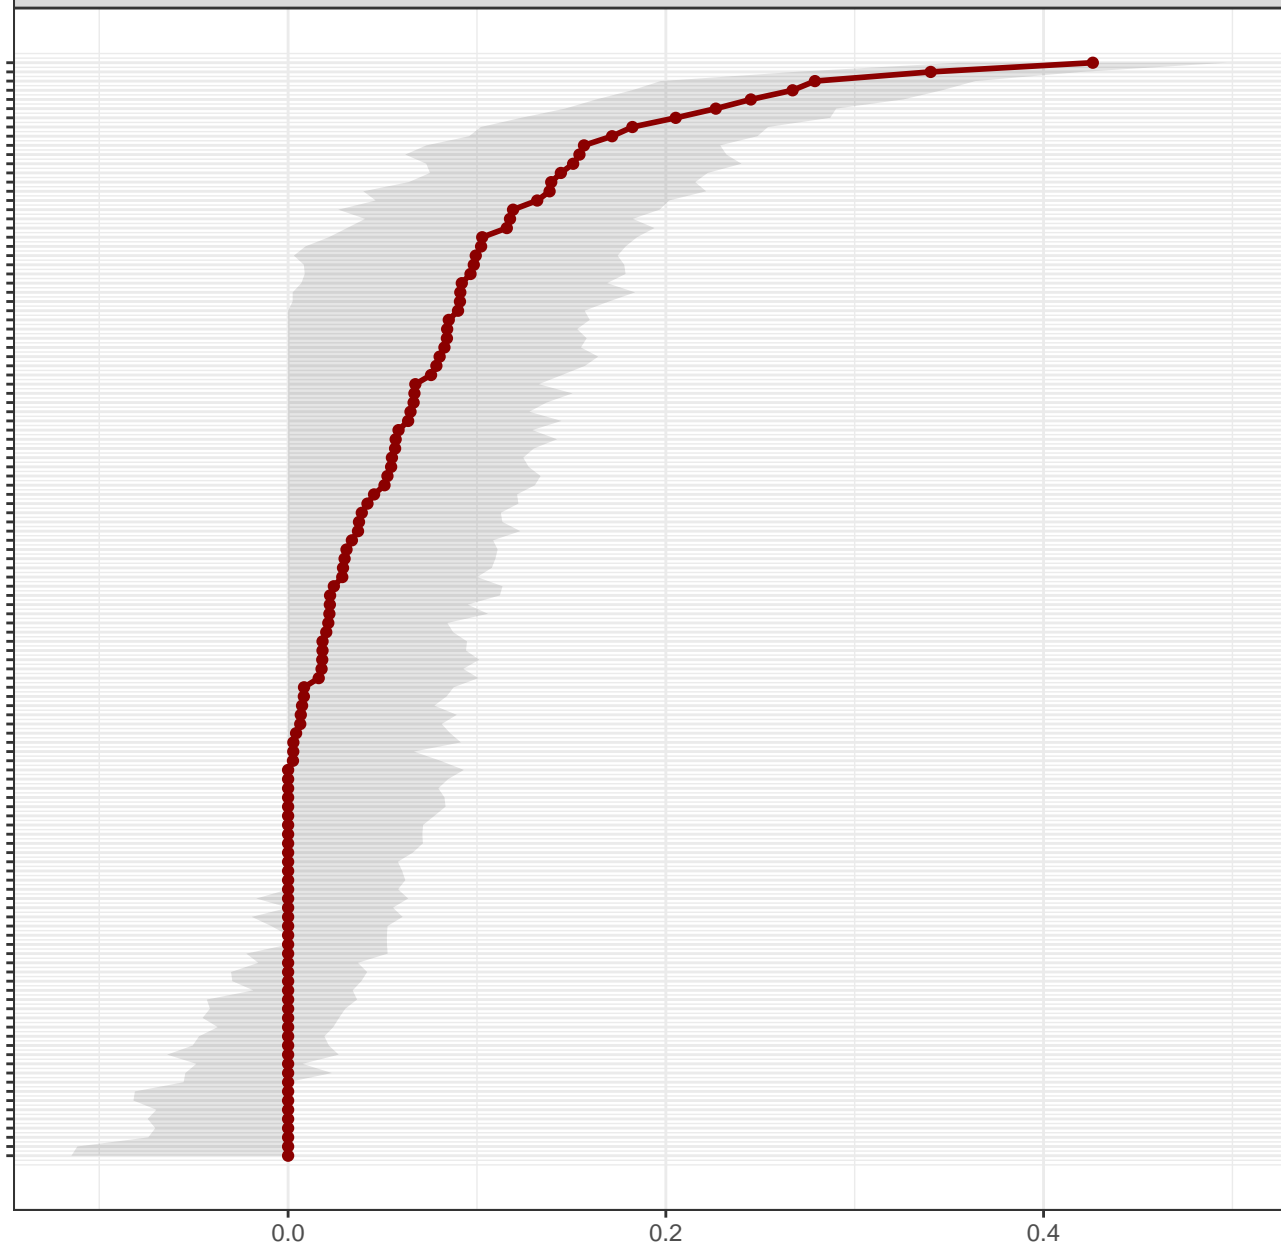

Supplement: Supplementary file 8 [file 13382156]

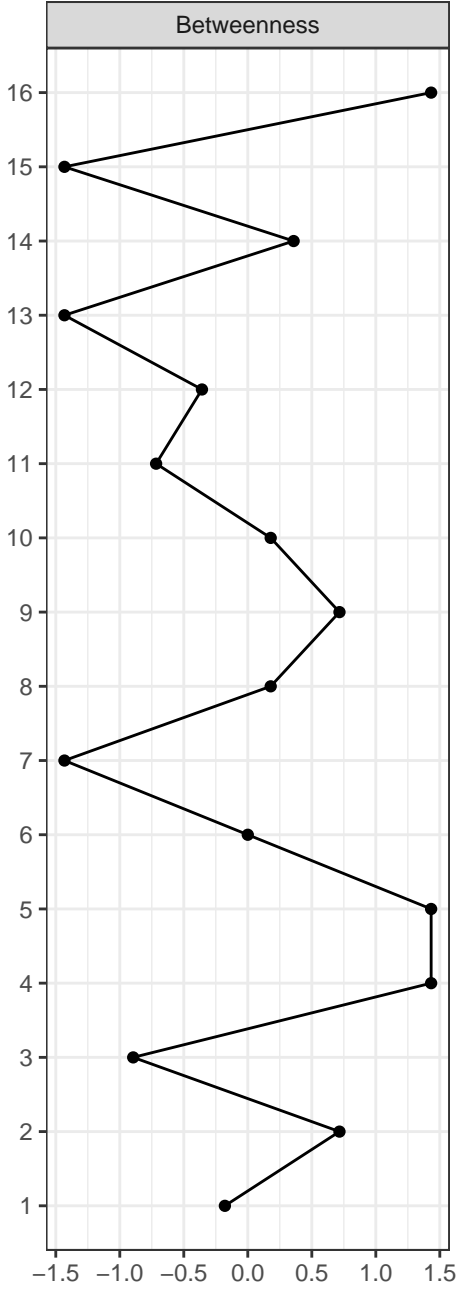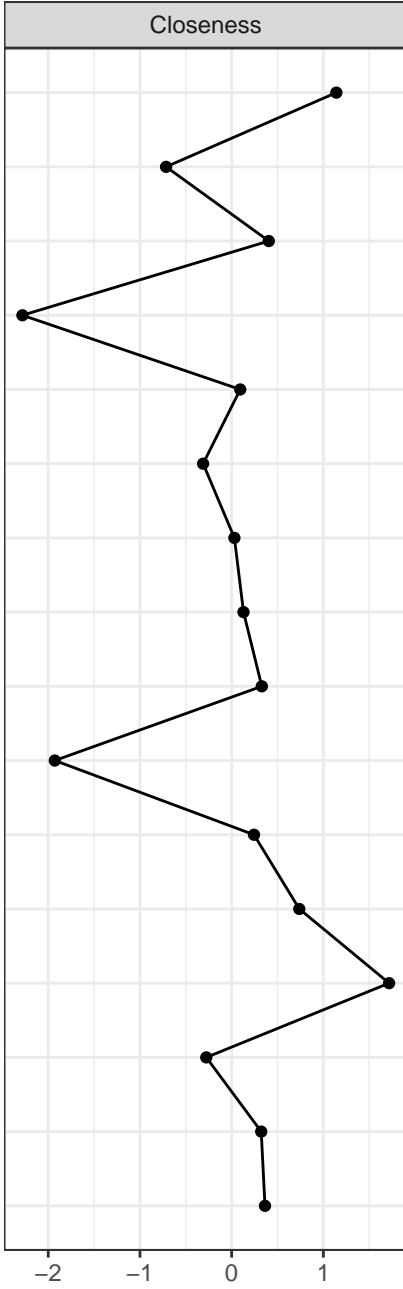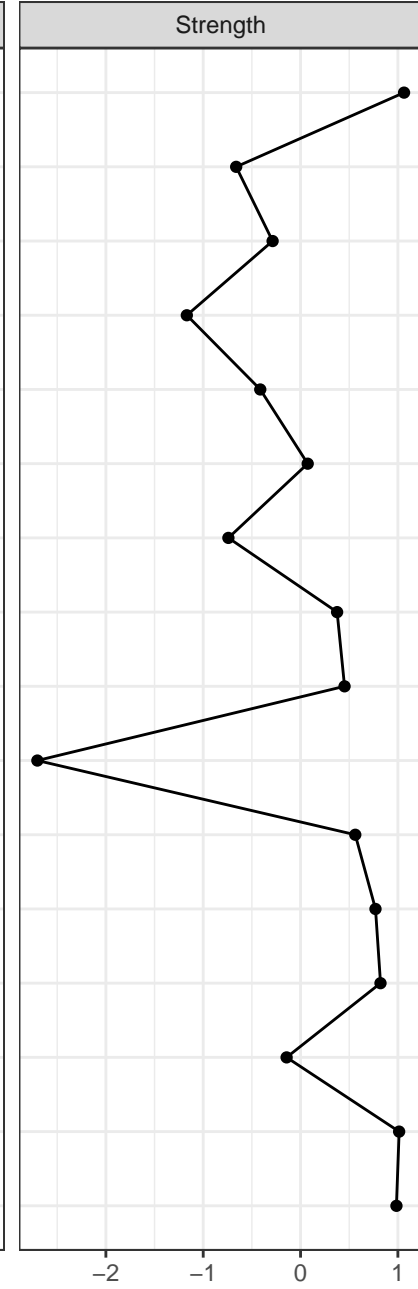

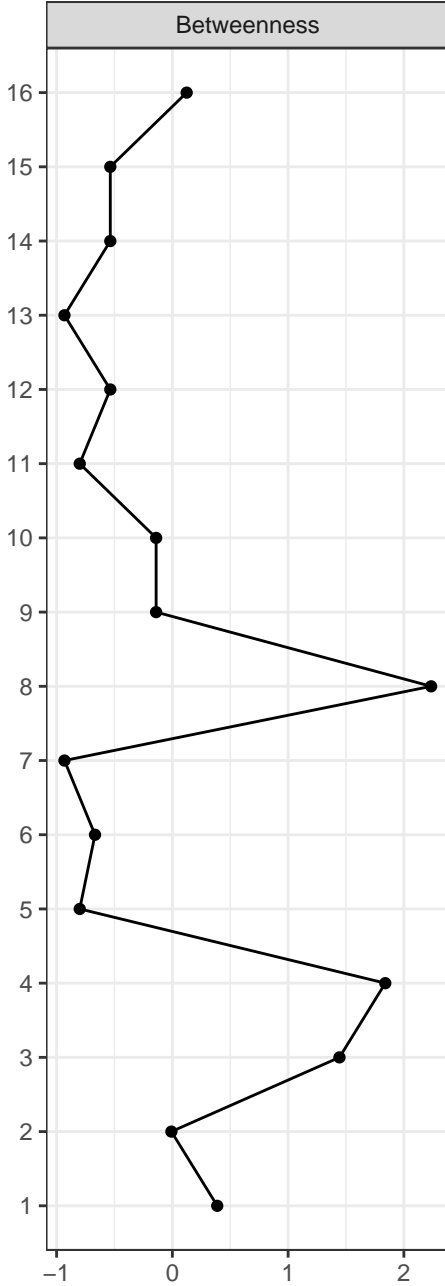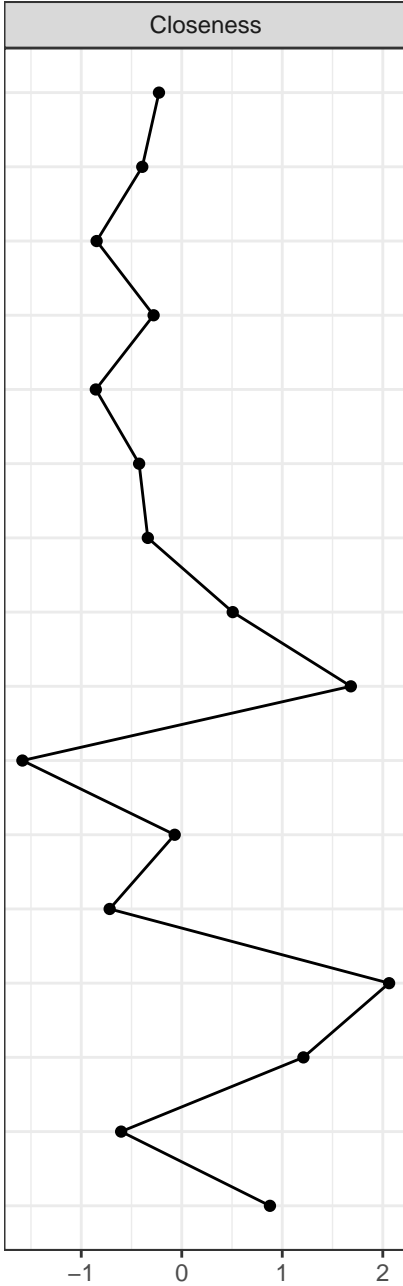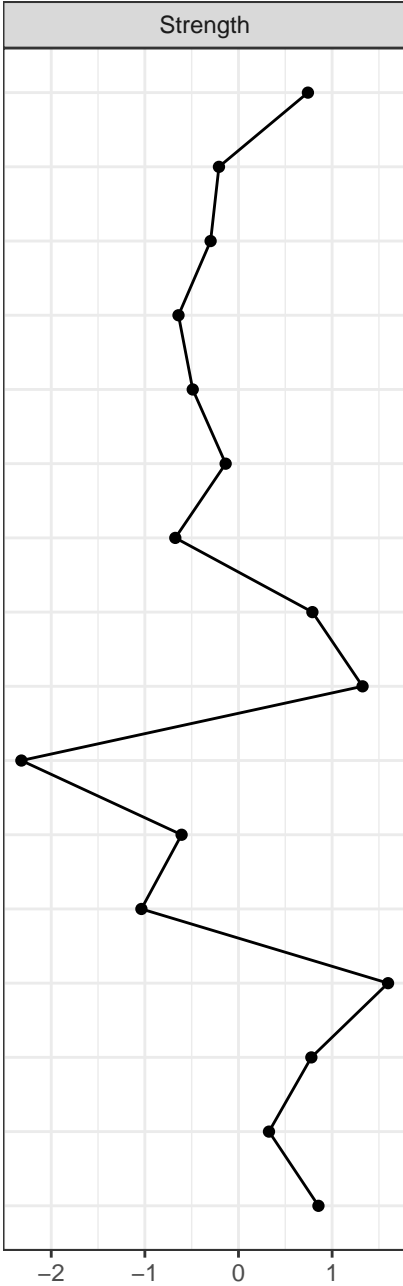

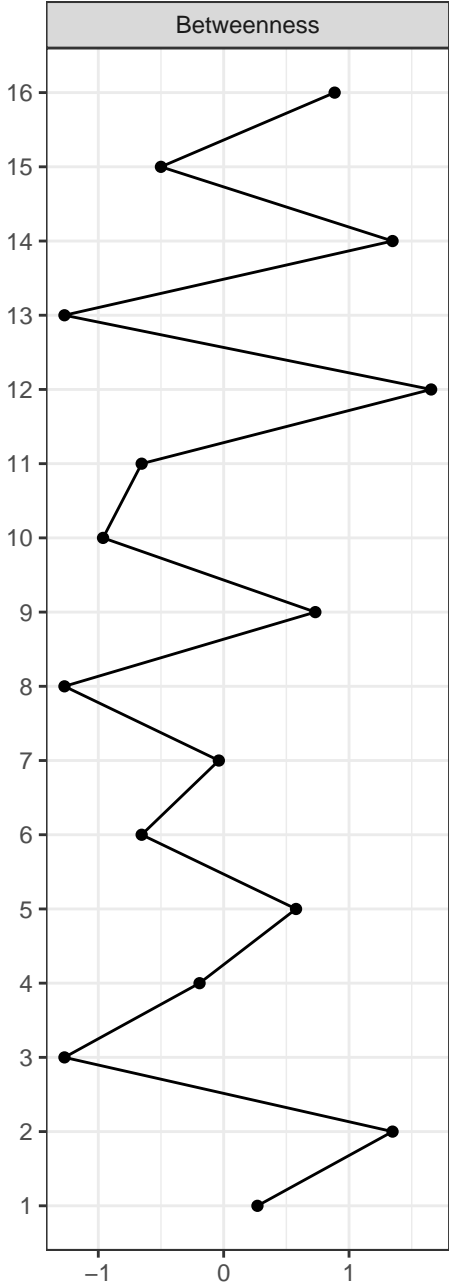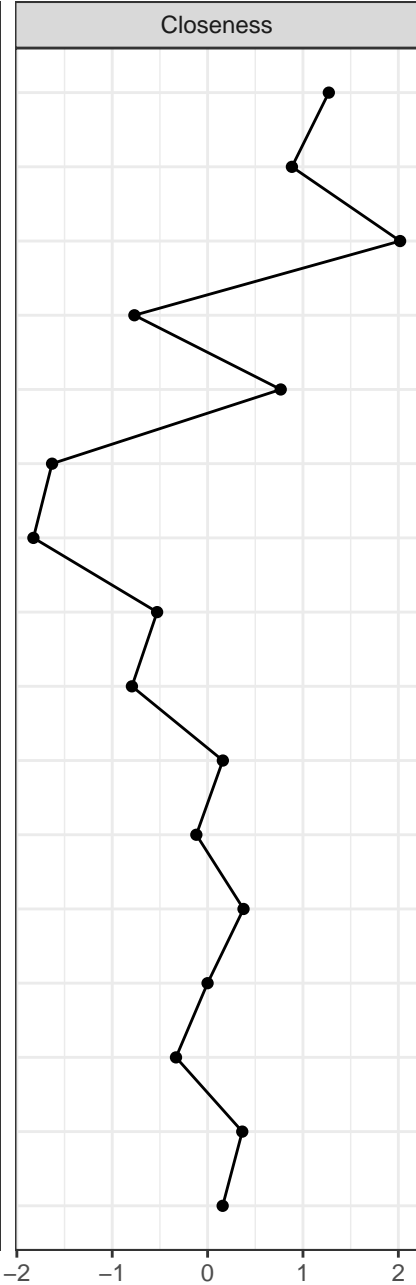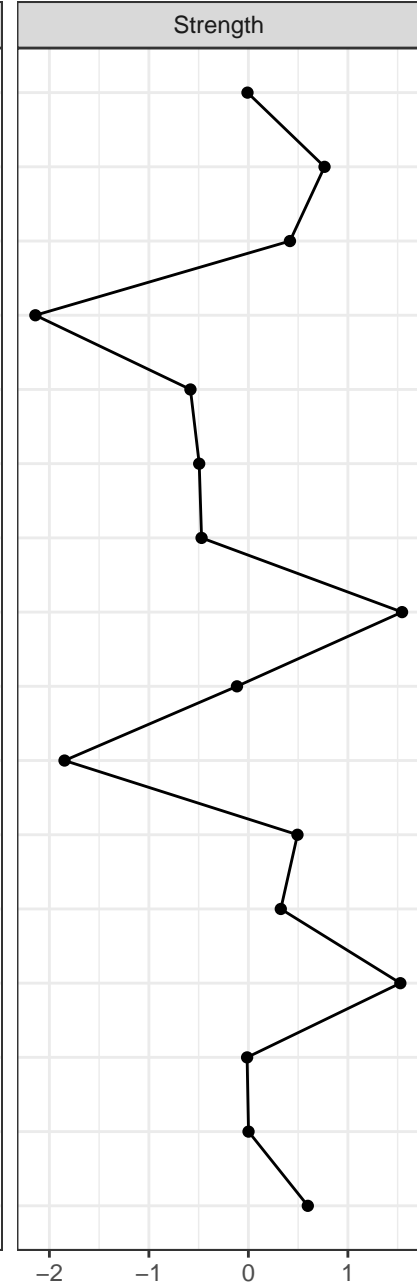

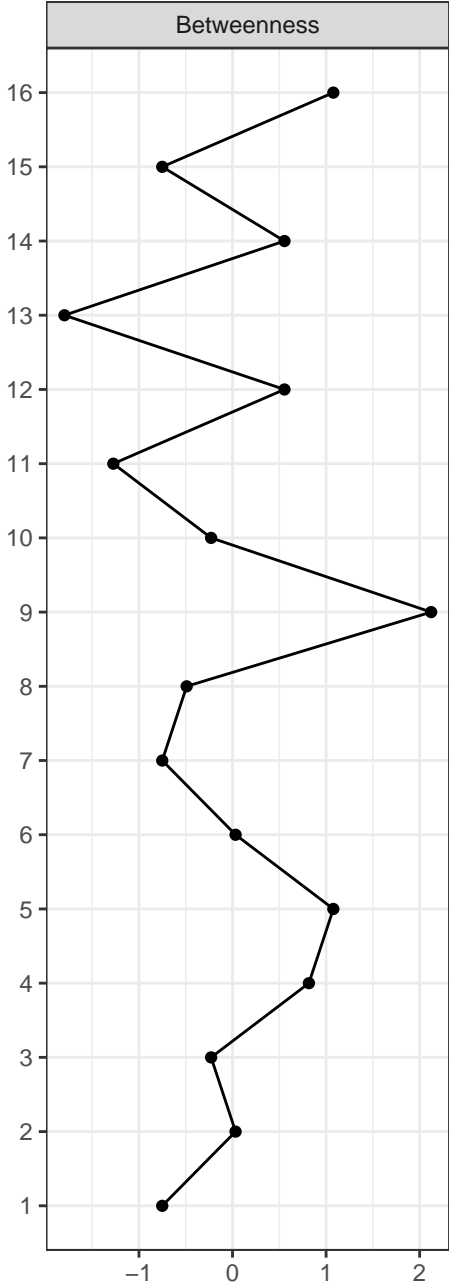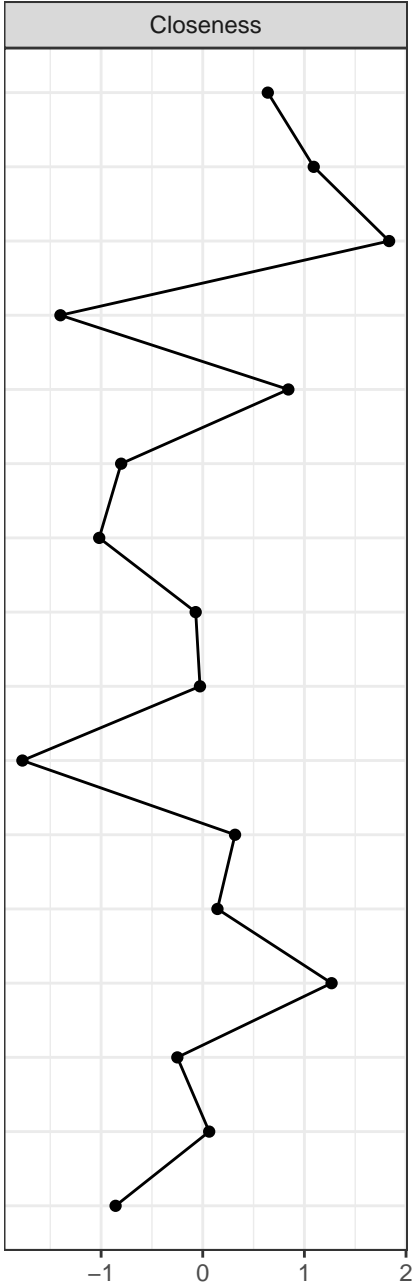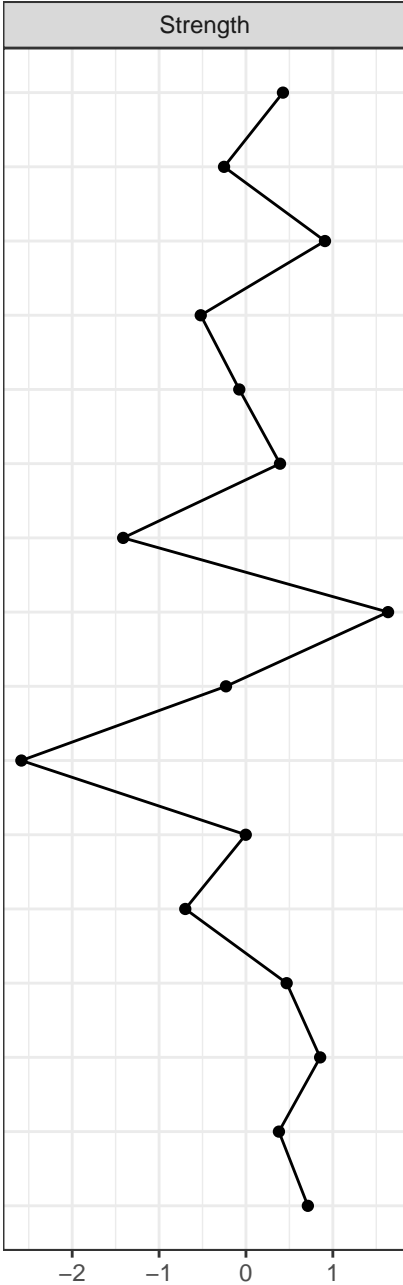

Supplement: Supplementary file 9 [file 13382156]

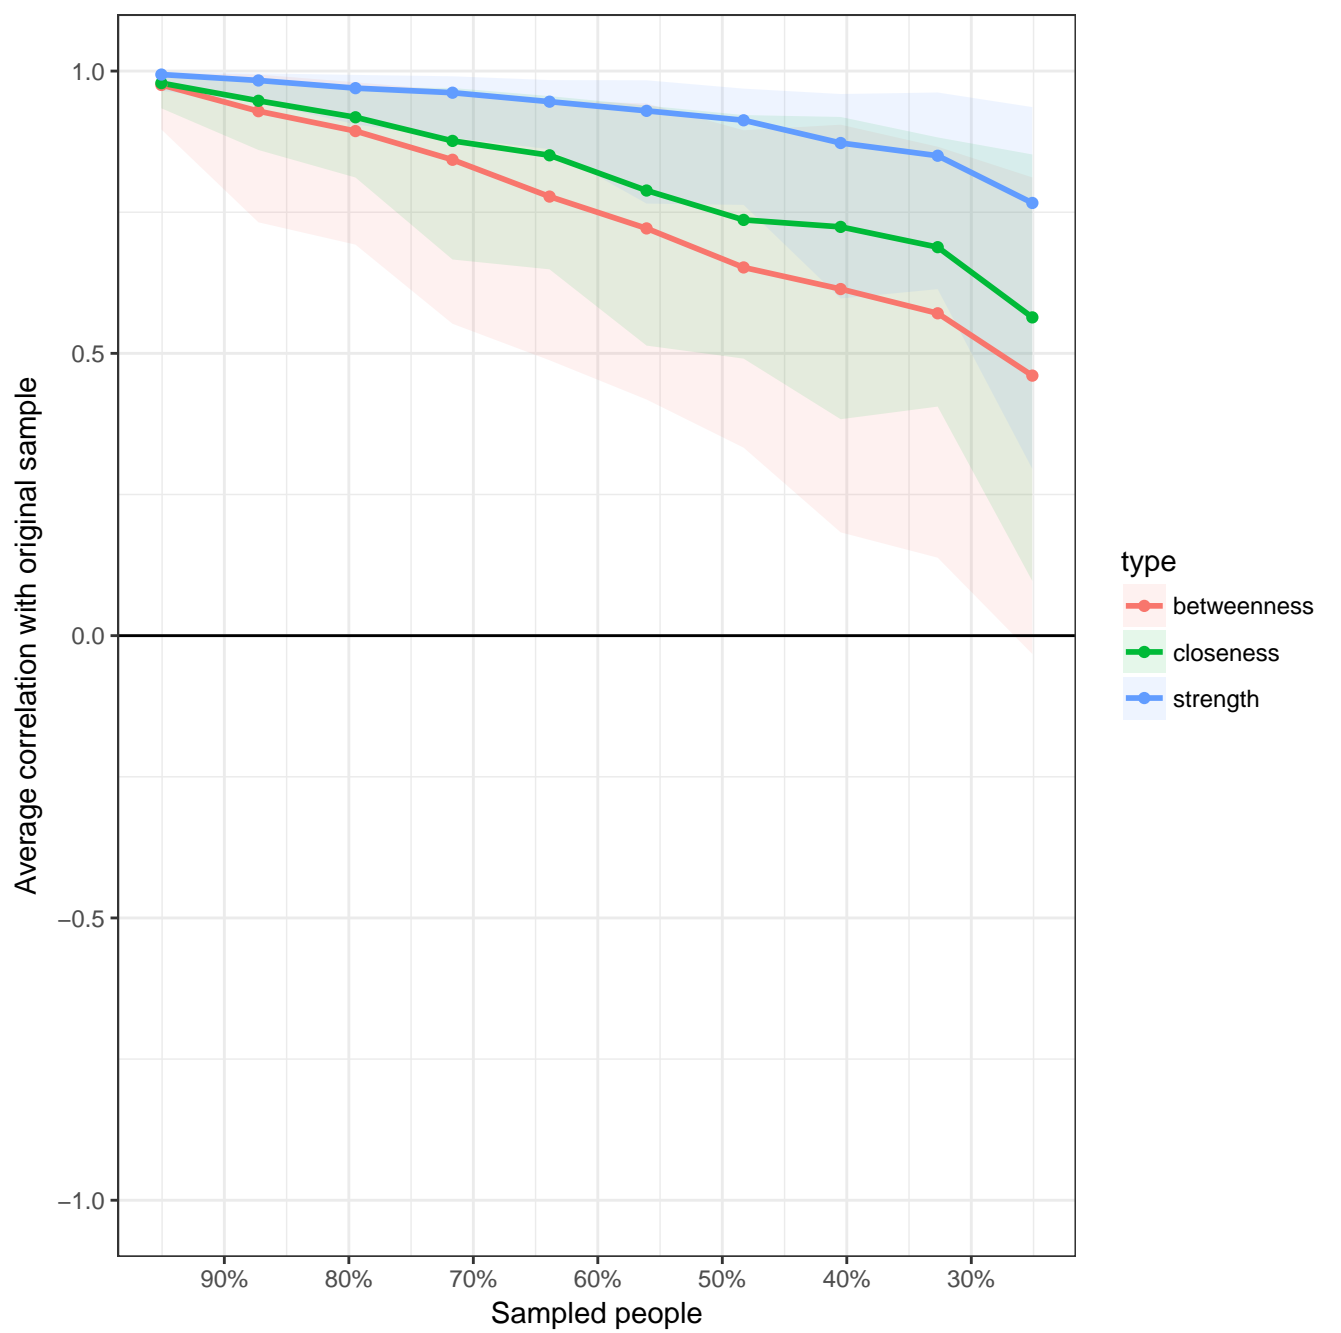

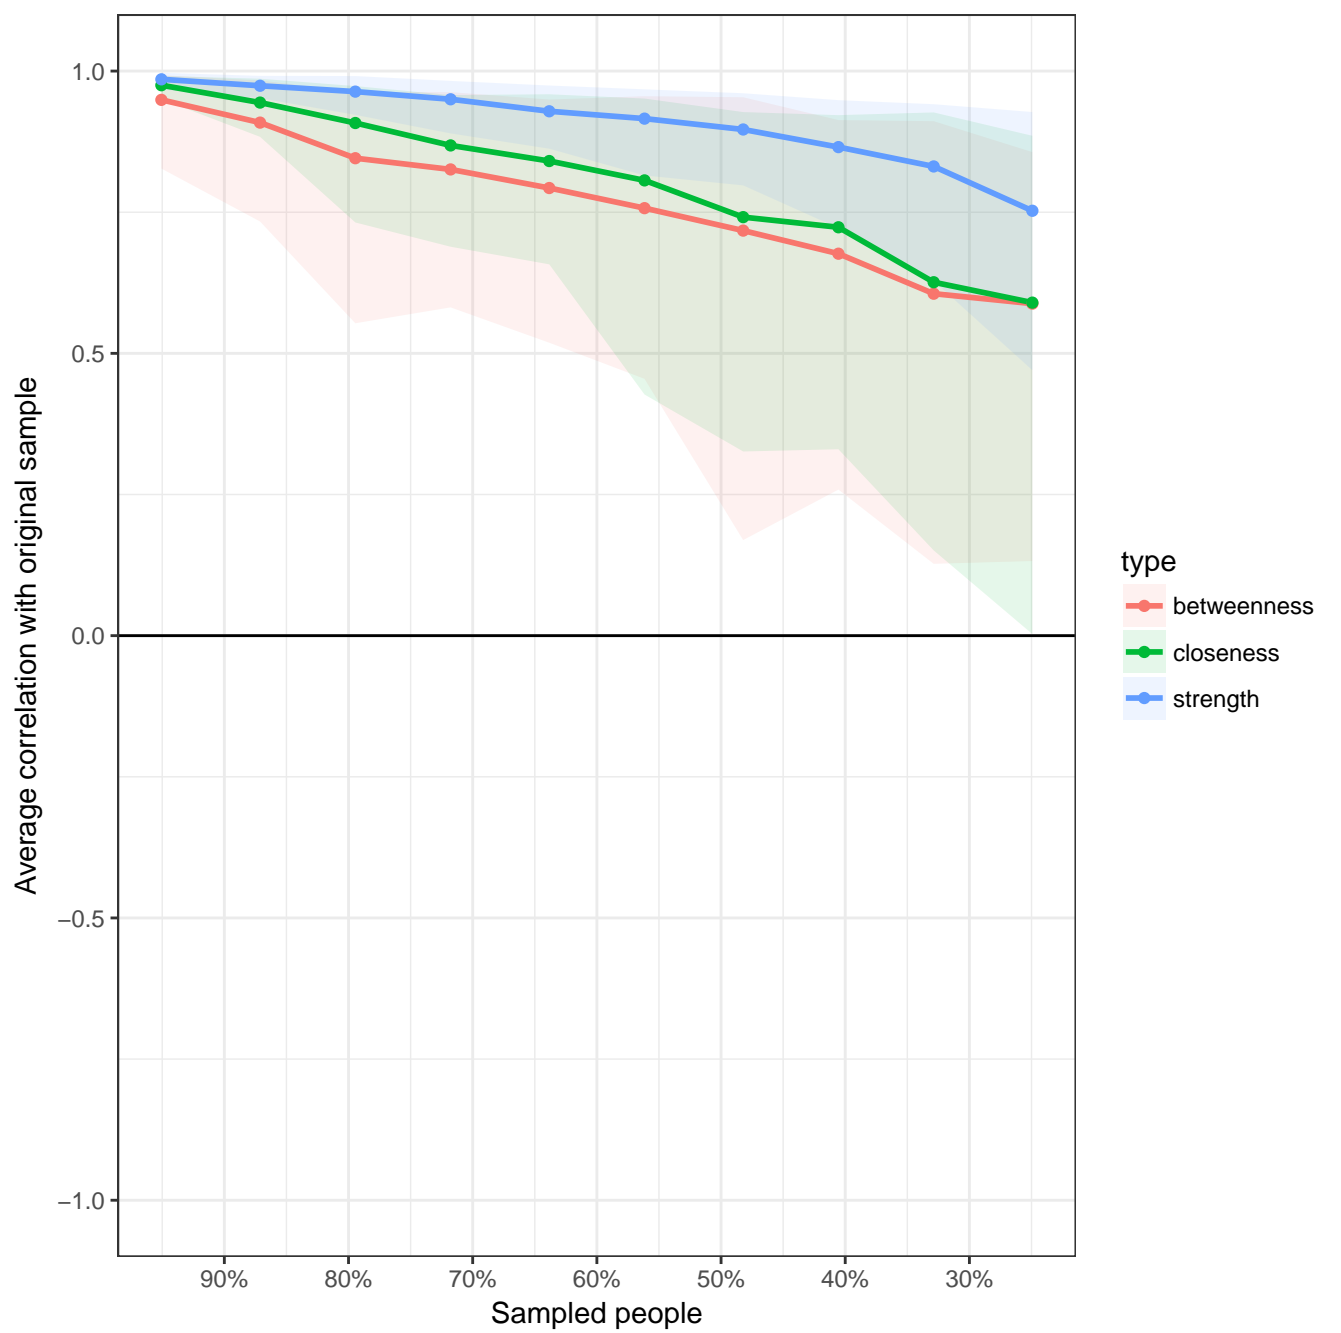

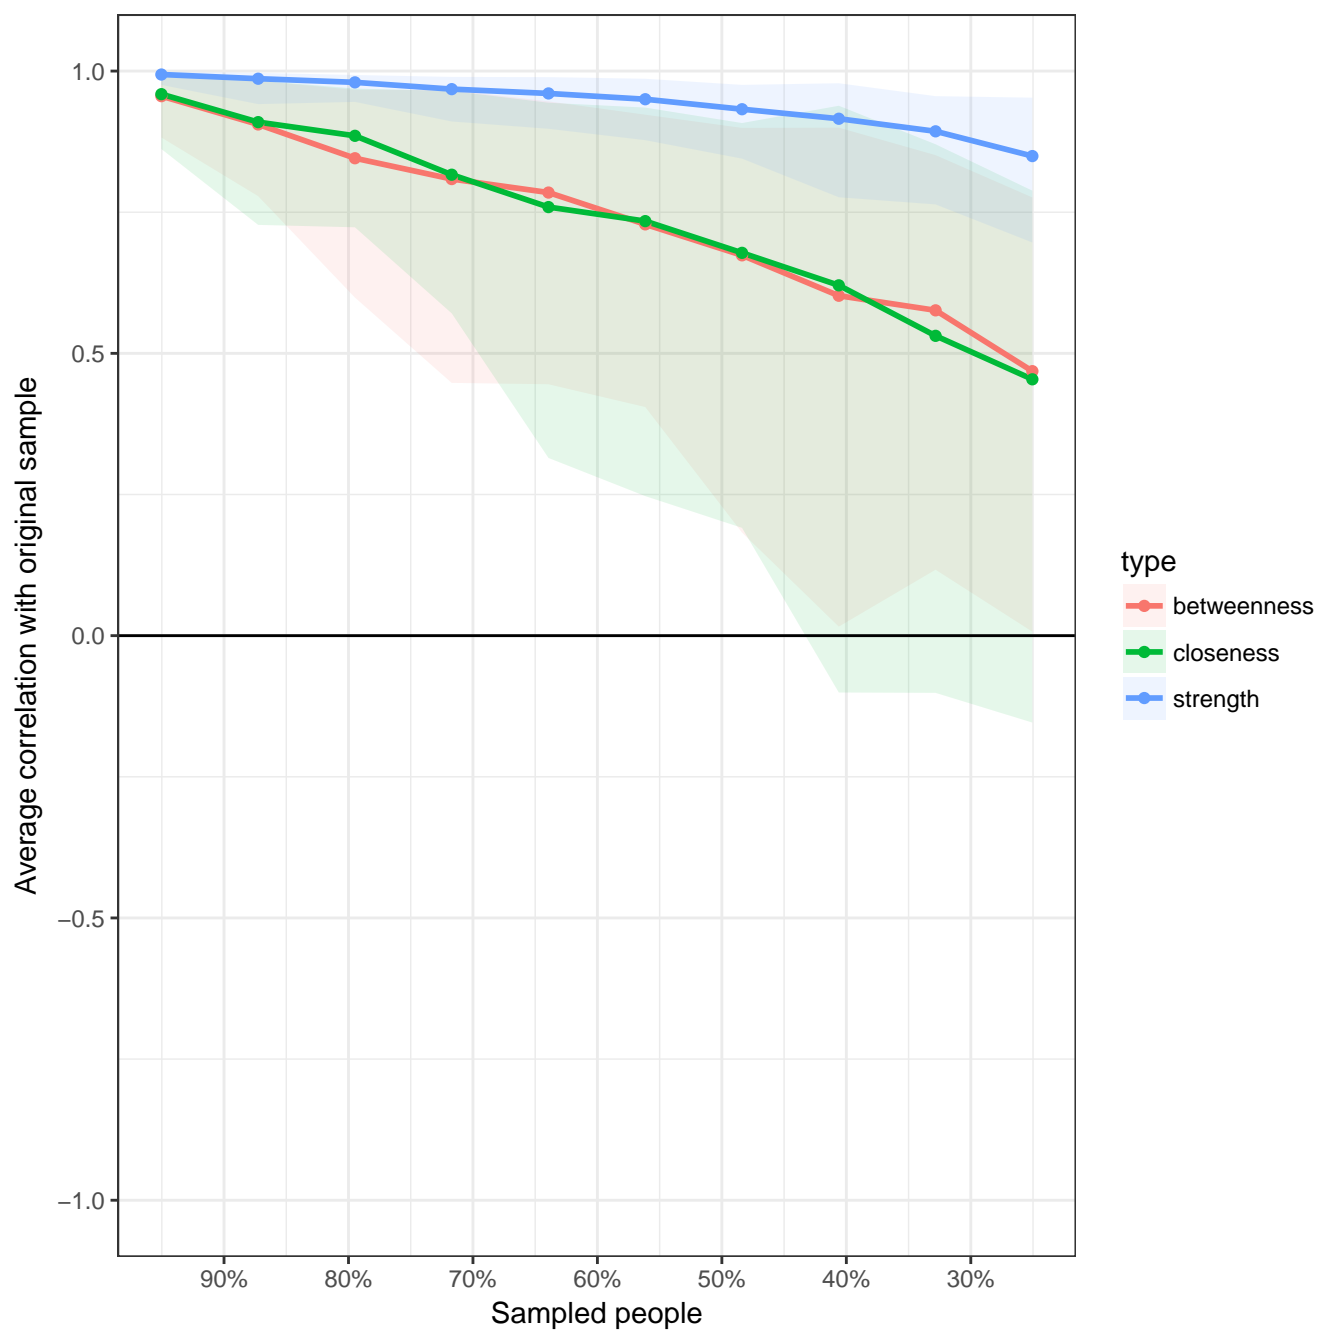

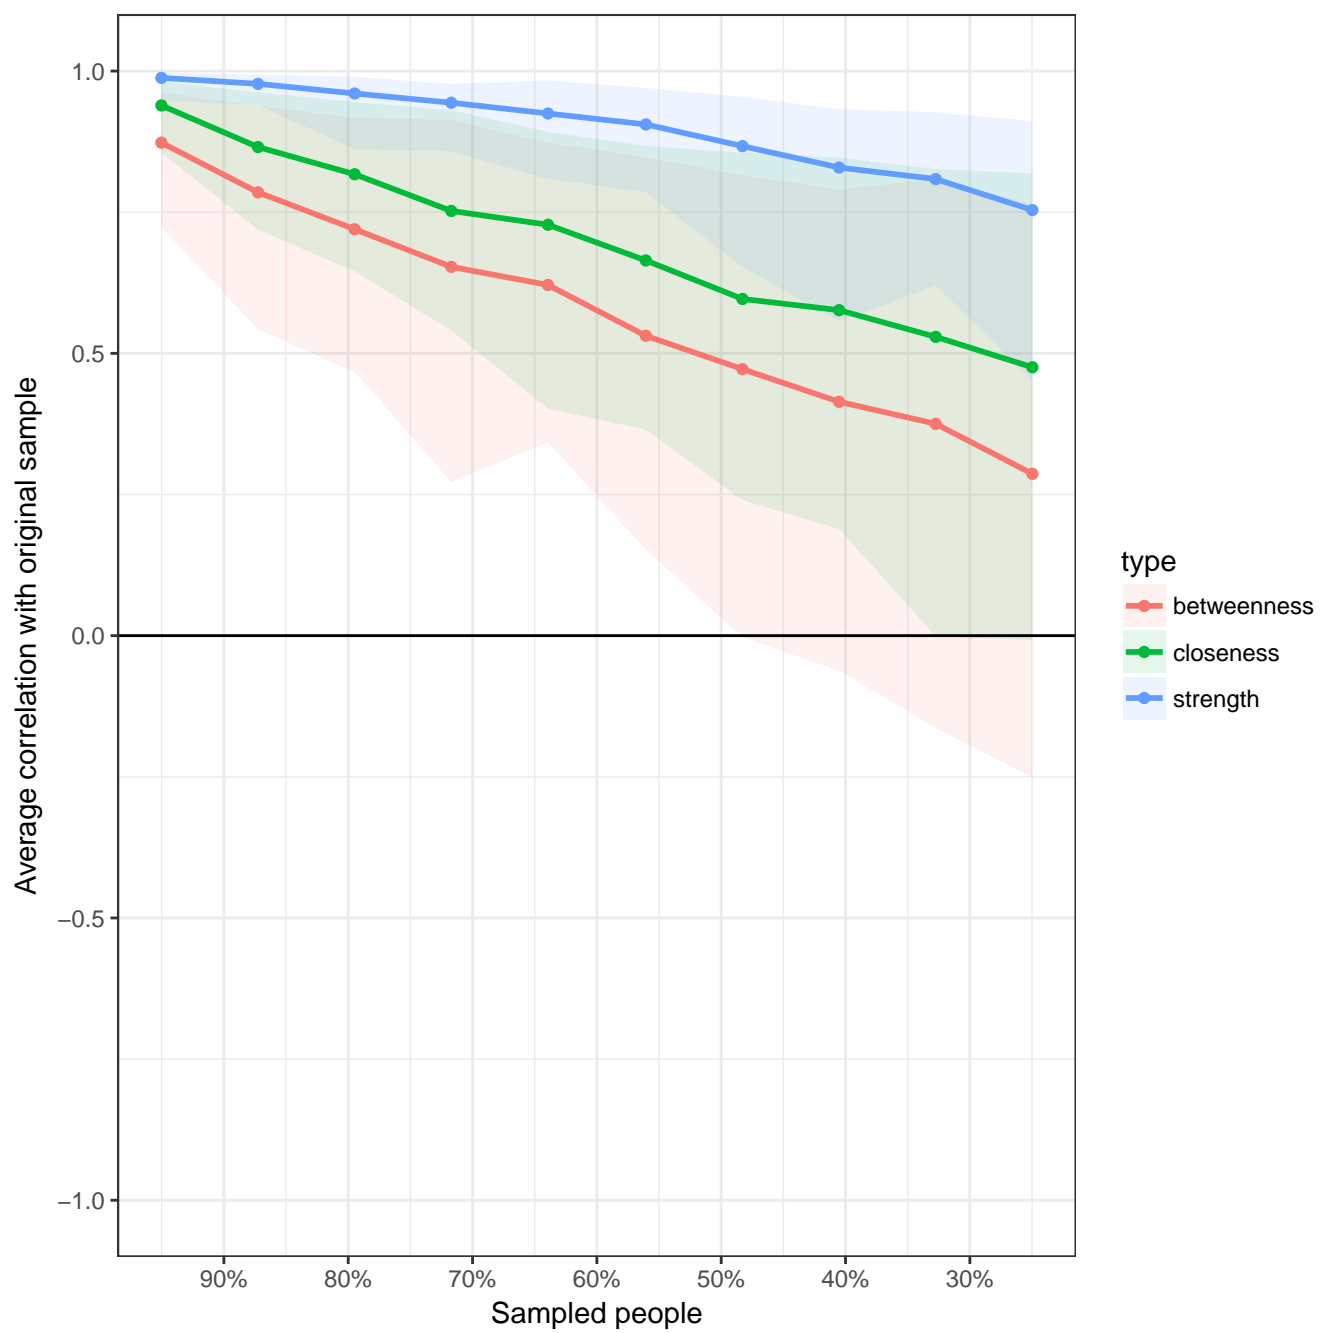

Supplement: Supplementary file 12 [file 13382156]

strength

1.10

1.10

1.10

1.10

1.00

1.00

0.98

0.96

0.94

0.88

0.83

0.82

0.77

0.74

0.69

0.38

strength

1.20

1.20

1.10

1.10

1.10

1.00

0.98

0.86

0.86

0.84

0.78

0.76

0.76

0.76

0.67

0.39

strength

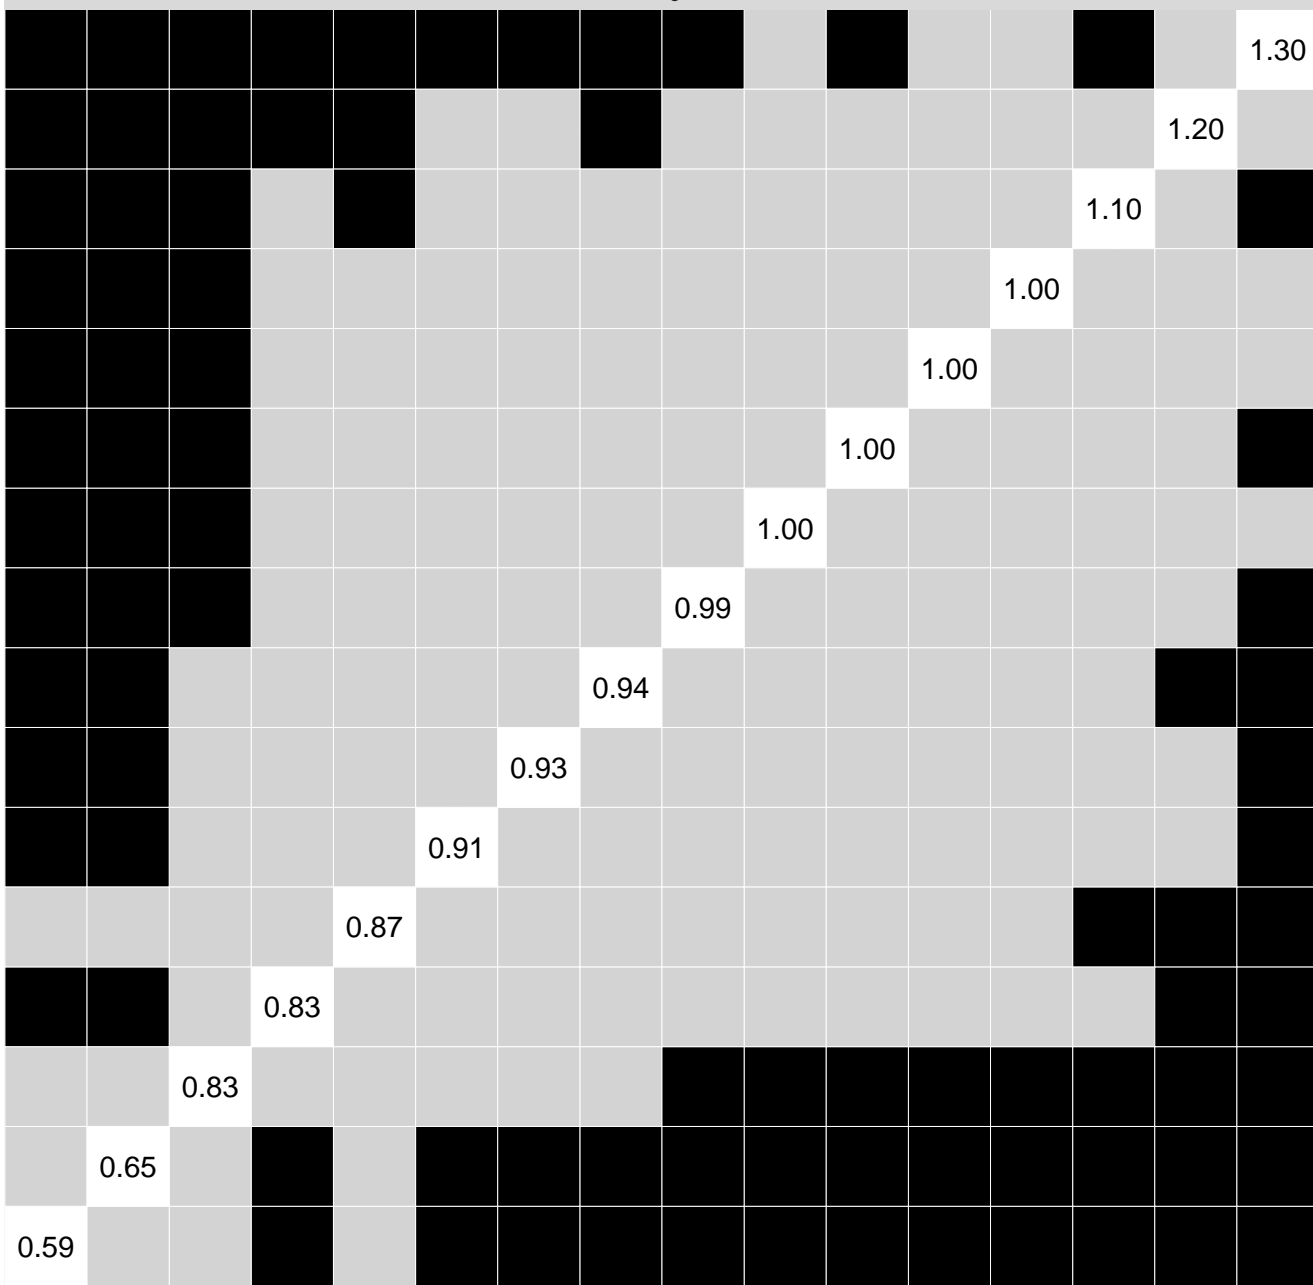

strength

0.97

0.96

0.95

0.93

0.89

0.88

0.87

0.84

0.81

0.80

0.79

0.77

0.76

0.65

0.64

0.45

Supplement: Supplementary file 14 [file 13382156]
